# Supplementary material for: Production of epoxydammaranes by the enzymatic reactions of (3R)- and (3S)-2,3-squalene diols and those of 2,3:22,23-dioxidosqualenes with recombinant squalene cyclase and the mechanistic insight into the polycyclization reactions
Source: Royal Society of Chemistry journal article supplement (doi:10.1039/b615897h), 2007-01-01
Supplement: b615897h.pdf [file b615897h.pdf]

## Electronic Supplementary Information (ESI)

**Production of epoxydammaranes by the enzymatic reactions of (3*R*)- and (3*S*)-2,3-squalene diols and 2,3:22,23-dioxidosqualenes with recombinant squalene cyclase. Mechanistic insight into the polycyclization reactions and evidence for the intermediacy of the 17-*epi*-dammarenyl cation**

Tsutomu Hoshino\*, Yukie Yonemura, Takamasa Abe and Yumi Sugino

Department of Applied Biological Chemistry, Faculty of Agriculture, and Graduate School of Science and Technology, Niigata University, Ikarashi, Niigata 950-2181, Japan.

Fax: +81-25-262-6854; E-mail: [hoshitsu@agr.niigata-u.ac.jp](mailto:hoshitsu@agr.niigata-u.ac.jp)

|                                                                                                                         | Page         |
|-------------------------------------------------------------------------------------------------------------------------|--------------|
| 1. Analytical methods                                                                                                   | ----- S2     |
| 2. Incubation conditions, GC and HPLC analyses                                                                          | ----- S2     |
| 3. Syntheses of (3 <i>R</i> )- <b>18</b> and (3 <i>S</i> )-2,3-oxidosqualene <b>19</b>                                  | ----- S3     |
| 4. Preparation of 2,3:22,23-dioxidosqualene <b>20-22</b>                                                                | -----S3      |
| 5. Purification methods of the enzymic products <b>31-42</b>                                                            | ----- S4     |
| 6. Spectroscopic data of all the isolated products                                                                      | -----S5-S20  |
| 5. Major Fragment ions of Enzymatic Products in EI-MS of Products <b>33,34</b> and <b>37-42</b>                         | ----- S21    |
| 6. GCMS of acetate mixtures obtained by incubating diastereomeric mixture of dioxidosqualene <b>20-22</b> (Minor Peaks) | -----S22-S23 |
| 7. References                                                                                                           | -----S23     |

## 1. Analytical methods

NMR spectra were recorded in  $C_6D_6$  on a Bruker DMX 600 or DPX 400 spectrometer, the chemical shifts being relative to the solvent peak  $\delta_H$  7.280 and  $\delta_C$  128.0 ppm as the internal reference for  $^1H$ - and  $^{13}C$  NMR spectra, respectively. NMR data of some compounds are measured in acetone- $d_6$  or in  $CDCl_3$ . The chemical shifts were given relative to the solvent peaks:  $\delta_H$  2.040 and  $\delta_C$  29.8 ppm for acetone  $d_6$ . In the case of the  $CDCl_3$  solutions, the chemical shifts given to TMS peak (0.00 ppm). The coupling constants  $J$  are given in Hz. GC analyses were done on a Shimadzu GC-8A chromatograph equipped with a flame ionization detector (DB-1 capillary column (0.53 mm  $\times$  30 m). GC-MS spectra were on a JEOL SX 100 spectrometer under electronic impact at 70 eV with a DB-1 capillary column (0.32 mm  $\times$  30 m). Isolation of some products was performed by a Hitachi LC system equipped with L-7100 pump and L-7405 UV detector, the product elution being monitored at 210 nm. HR-EIMS was performed by direct inlet system. Specific rotation values were measured at 25°C with a Horiba SEPA-300 polarimeter.

## 2. Incubation conditions, GC and HPLC analyses

Standard culture of *E. coli* and incubation conditions were performed according to our published protocols.<sup>1</sup> The cell-free extract was prepared as follows. One liter culture of *E. coli* encoding the native SHC was harvested by centrifugation and to the collected pellets was added 50 cm<sup>3</sup> of citrate buffer solution (pH 6.0, 50 mM), and then subjected to ultrasonication to disrupt the cells. The supernatant was used for the incubations after removing the cell debris by centrifugation. One cm<sup>3</sup> of the supernatant contains *ca.* 200  $\mu$ g of the pure SHC. One mg of the substrate analogs and 20 mg of Triton X-100 were emulsified with 1.0 ml of distilled water and 3.0 ml of Na-citrate buffer solution (pH 6.0, 0.5 M). To the solution was added 2.0 ml of the cell-free extract and then incubated at 60°C for 12 h. To terminate the enzyme reaction, 6 ml of 15% KOH/MeOH was added and heated at 80°C for 30 min. The lipophilic enzymic products and the substrate analogs, which remained unreacted, were extracted four times with hexane (5 ml) from the incubation mixtures, and the quantities of the products and the starting materials were estimated by GC analyses with a DB-1 capillary column (30 m in length, J & W Scientific, USA). GC conditions: injection temp. 280°C, column temp., 280°C and carrier pressure, 1.0 Kg/cm<sup>2</sup>. In the case of diepoxides **20-22**, the product distribution was estimated after acetylation with  $Ac_2O/Py$  at room temperature. The GC condition was the same as that of

the diol. HPLC conditions: a Mightysil Si 60 (5  $\mu$ m) column and detection at 210 nm.

### 3. Syntheses of (3*R*)-**18** and (3*S*)-**2,3-oxidosqualene 19**

These compounds were synthesized according to published methods.<sup>2</sup> Treatment of the chiral ligand of (DHQ)<sub>2</sub>PHAL with **1** gave **14**, **16** and **18**, while that of (DHQD)<sub>2</sub>PHAL afforded **15**, **17** and **19**. Separation of **18** and **19** from other diols was easily done by a SiO<sub>2</sub> column chromatography eluting with hexane: EtOAc (100: 15), because the *R<sub>f</sub>* value of **18** or **19** was relatively lower than those of **14-17**. <sup>1</sup>H NMR (C<sub>6</sub>D<sub>6</sub>, 400 MHz);  $\delta_{\text{H}}$  5.41 (m, 5H), 3.33 (bd, *J* 10.4, 1H), 2.43 (m, 1H), 2.3-2.1 (m, 17H), 1.98 (bs, 1H, OH), 1.81 (s, 3H), 1.74 (s, 3H), 1.73 (s, 6H), 1.71 (s, 3H), 1.69 (s, 3H), 1.62-1.45 (m, 2H), 1.152 (s, 3H), 1.145 (s, 3H). <sup>13</sup>C NMR (C<sub>6</sub>D<sub>6</sub>, 100.6 MHz);  $\delta_{\text{C}}$  135.25 (s), 135.19 (s), 135.06 (s), 134.96 (s), 131.09 (s), 125.09 (d), 124.97 (d), 124.93 (d), 124.82 (d), 124.79 (d), 78.26 (d), 72.53 (s), 40.20 (2C, t), 40.16 (t), 37.22 (t), 30.12 (t), 28.73 (2C, t), 27.21 (t), 27.09 (t), 27.00 (t), 26.38 (q), 25.84 (q), 23.55 (q), 17.72 (q), 16.16 (q), 16.10 (2C, q), 16.03 (q). The NMR data of **18** was superimposable on that of **19**, because of enantiomeric relationship between them. EIMS of **18** and **19** (%); *m/z* 69 (46), 81 (100), 95 (43), 109 (37), 135 (37), 153 (42), 411 (3); 426 (4), 444 (M<sup>+</sup>, 2). The specific rotations,  $[\alpha]_{\text{D}}^{25}$ , **18** and **19** were +10.9° (*c* 2.1, CHCl<sub>3</sub>, lit.<sup>3,4</sup> +10.7 or + 11.4) and -10.7 (*c* 2.2, CHCl<sub>3</sub> lit.<sup>3,4</sup> -10.7 or -11.8), respectively, indicating that the enantiomeric excess of **18** and **19** was close to 100%.

### 4. Preparation of 2,3:22,23-dioxidosqualene **20-22**

The three-necked flask containing **1** (1.0 g) dissolved in 50 cm<sup>3</sup> of THF was cooled at 0°C, and water was added under N<sub>2</sub> atmosphere until the solution became slightly cloudy. To the flask was added NBS (*N*-Bromosuccinimide, 1 g) in a portion and stirred for 3 h. The reaction mixture was poured into ice water. The product and unreacted **1** were extracted with hexane (50 ml x 3) and then dried over anhydrous Na<sub>2</sub>SO<sub>4</sub>. The desired dibromohydrin of **1** was purified with SiO<sub>2</sub> column chromatography eluting with hexane:EtOAc (100:2~100:10), affording 270 mg (18% yield). The stirred solution of K<sub>2</sub>CO<sub>3</sub> (204 mg) in MeOH (30 cm<sup>3</sup>) was added in a portion to the dibromohydrin for 2 h, and then poured into ice water. The desired oxidosqualene was extracted with hexane and subjected to a SiO<sub>2</sub> column chromatography with hexane:EtOAc (100:1~100:3) to give diastereomers **20-22** in a yield of 180 mg (90 %). <sup>1</sup>H NMR (C<sub>6</sub>D<sub>6</sub>, 600 MHz);  $\delta_{\text{H}}$  5.39 (br s, 2H), 5.34 (br t, *J* 6.6, 2H), 2.77 (t, *J* 6.1, 2H), 2.30-2.15 (m, 8H), 1.75-1.6 (m, 2H), 1.71 (s, 6H), 1.65 (s, 6H), 1.26 (s, 6H), 1.22 (s, 6H). <sup>13</sup>C NMR (C<sub>6</sub>D<sub>6</sub>, 150.9 MHz);  $\delta_{\text{C}}$  135.0 (s,

2C), 134.3(s, 2C), 125.1 (d, 2C), 124.9 (d, 2C), 63.45 (d, 2c), 57.29 (s, 2C), 40.11 (t, 2C), 36.8 (t, 2C), 28.71 (t, 2C), 28.00 (t, 2C), 27.04 (t, 2C), 24.98 (q, 2C), 18.90 (q, 2C), 16.15 (q, 2C), 16.06 (q, 2C). EIMS (%):  $m/z$  69 (45), 81 (95), 93 (92), 107 (68), 135 (100), 203 (32), 406 (15), 424 (20), 442 ( $M^+$ , 2).

### 5. Purification methods of the enzymic products 31-42

The reaction mixture of **18**, obtained by the large scale incubation, was subjected to a  $SiO_2$  column chromatography eluting with hexane: EtOAc (100:3~100:20) to afford three fractions with low, medium and high polarity, the  $R_f$  values on  $SiO_2$  TLC being 0.65, 0.42 and 0.18 [hexane: EtOAc (100:20)], respectively. To obtain pure **33**, the low polar fraction containing **33** was subjected to HPLC (hexane: 2-PrOH=100:0.15). A repetitive  $SiO_2$  column chromatography (hexane: EtOAc=100:1) of the medium polar fraction afforded **34** in a pure state. Separation of high polar products **31** and **32** was done by 5%  $AgNO_3$ -impregnated  $SiO_2$  column chromatography (hexane: EtOAc= 100:10~100:15), **31** being followed by **32**, then each fraction was subjected to normal phase HPLC with *n*-hexane:2-PrOH (100:0.8) gave pure **31** and **32**. Isolation of products **35-38** from diol **19** was carried out in a similar way as that of the products from **18**. The reaction mixture of **19** was divided into two fractions (low and high polar products) by a  $SiO_2$  column chromatography [hexane: EtOAc (100:3~100:20)]. **37** and **38** included in the low polar fraction were separated by the repetitive  $SiO_2$  column chromatography [hexane: EtOAc=100:2], the  $R_f$  values of **37** and **38** being 0.70 and 0.58 on a  $SiO_2$  TLC, respectively. Separation of **35** and **36** included in a high polar fraction was achieved by 5%  $AgNO_3$ - $SiO_2$  column chromatography in a similar way as that of **31** and **32**. Products **39-42** from diastereomeric mixture **20-22** were isolated as follows. After removing an excess of Triton X-100 by passing a short  $SiO_2$  column, the residues were chromatographed over  $SiO_2$  eluting with hexane-EtOAc (100:2). The purified fraction was nearly homogeneous on  $SiO_2$  TLC. However, normal phase HPLC analysis of the acetylated products [hexane: 2-PrOH (100:0.4)], prepared with  $Ac_2O/Py$ , revealed that four products **39-42** were mixed. Each of the products was isolated by HPLC as shown in Fig. 4B.

### 6. Spectroscopic data of all the isolated products.

## Product 31

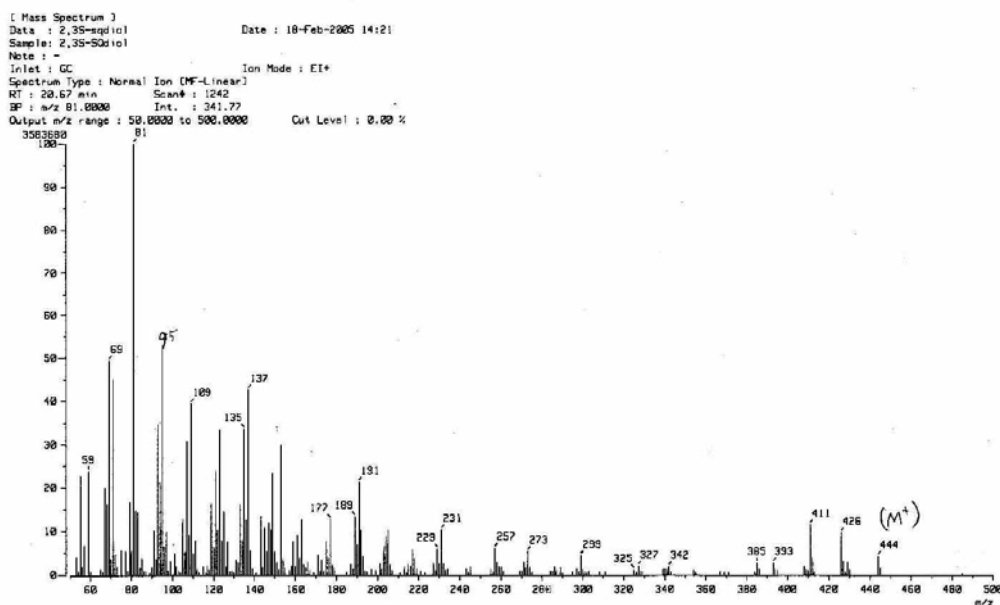

## Product 31 (oil) from diol 18

$[\alpha]_D^{25} = +79.6$  (EtOH)  
 $c = 0.40$  HREIMS:  $m/z$   
( $M^+$ ), calcd. for  
 $C_{30}H_{52}O_2$ ,  
444.3967; found,  
444.3972.

→ HMBC  
↔ NOE

600 MHz

NMR data,  $\delta$ ppm, in  $C_6D_6$

relative to  $C_6D_6$ :  $^1H$ : 7.28ppm,  $^{13}C$ : 128.0ppm

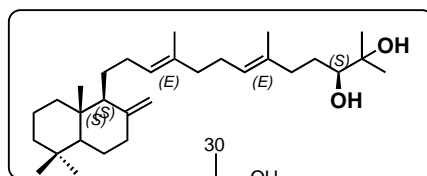

| NO. | $^1H$             | $^{13}C$ | NO. | $^1H$                     | $^{13}C$ | NO. | $^1H$                  | $^{13}C$ | NO. | $^1H$                   | $^{13}C$ |
|-----|-------------------|----------|-----|---------------------------|----------|-----|------------------------|----------|-----|-------------------------|----------|
| 1   | 1.08 (m); 1.83(m) | 39.31    | 9   | 1.78 (m)                  | 56.52    | 17  | 5.46 (br s)            | 125.13   | 25  | 0.868 (3H, s)           | 14.75    |
| 2   | 1.55 (m); 1.66(m) | 19.76    | 10  | —                         | 39.84    | 18  | —                      | 135.29   | 26  | 4.84 (br s); 5.10(br s) | 106.66   |
| 3   | 1.27 (m); 1.49(m) | 42.43    | 11  | 1.62(m); 1.69(m)          | 24.24    | 19  | 2.21(m); 2.44(m)       | 37.24    | 27  | 1.770 (3H, s)           | 16.16    |
| 4   | —                 | 33.66    | 12  | 2.15(m); 2.45(m)          | 27.43    | 20  | 1.50(m); 1.61(m)       | 30.13    | 28  | 1.725 (3H, s)           | 16.06    |
| 5   | 1.14(m)           | 55.65    | 13  | 5.46 (br s)               | 125.80   | 21  | 3.35 (dd, 10.4, 1.8Hz) | 78.28    | 29  | 1.148 (3H, s)           | 26.40    |
| 6   | 1.41(m); 1.75(m)  | 24.76    | 14  | —                         | 134.95   | 22  | —                      | 72.56    | 30  | 1.154 (3H, s)           | 23.58    |
| 7   | 2.11(m); 2.52(m)  | 38.73    | 15  | 2.26 (2H, t, 7.8Hz)       | 40.21    | 23  | 0.965 (3H, s)          | 33.72    |     |                         |          |
| 8   | —                 | 148.87   | 16  | 2.34 (2H, dt, 7.6, 7.6Hz) | 27.13    | 24  | 0.921 (3H, s)          | 21.89    |     |                         |          |

The assignments of H-29, H-30, C-29 and C-30 are exchangeable.

## Product 32

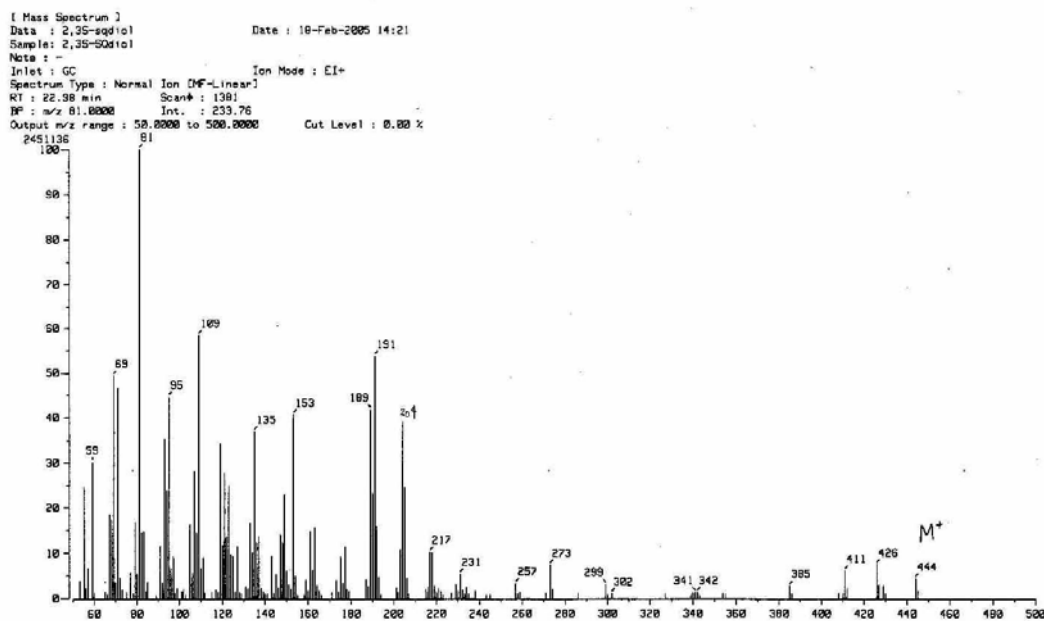

### Product 32 (oil) from diol 18

$[\alpha]_D^{25} = -33.3$  (EtOH),  $c = 0.41$   
HRMS  $M^+$ , calcd. for  $C_{30}H_{52}O_2$ , 444.3967;  
found, 444.3966.

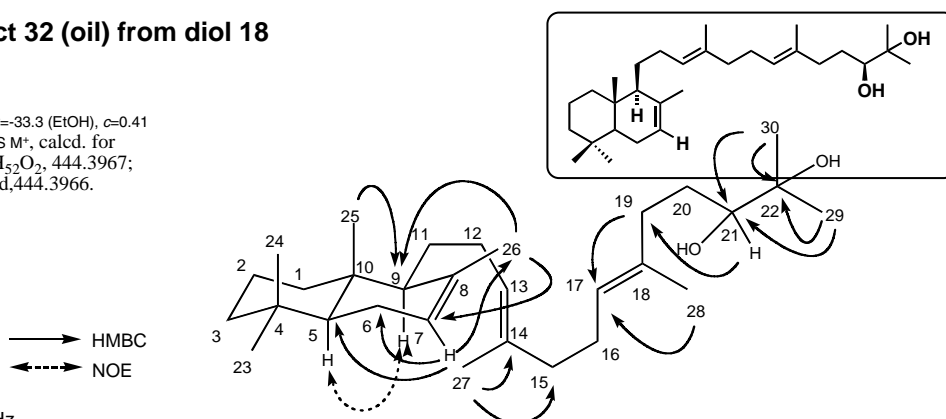

600 MHz

NMR data,  $\delta$ ppm in  $C_6D_6$  relative to  $C_6D_6$ :  $^1H$ ; 7.28ppm,  $^{13}C$ ; 128.0ppm

| NO. | $^1H$                                | $^{13}C$            | NO. | $^1H$                | $^{13}C$ | NO. | $^1H$             | $^{13}C$            | NO. | $^1H$                      | $^{13}C$           |
|-----|--------------------------------------|---------------------|-----|----------------------|----------|-----|-------------------|---------------------|-----|----------------------------|--------------------|
| 1   | 1.08(m) ; 1.98(m)                    | 39.49               | 9   | 1.79(m)              | 54.57    | 17  | 5.46 (bt, 6.8Hz)  | 125.07              | 25  | 0.955 (3H, s)              | 13.77              |
| 2   | 1.55(m) ; 1.65(m)                    | 19.21               | 10  | —                    | 37.02    | 18  | —                 | 135.34 <sup>a</sup> | 26  | 1.916 (3H, s)              | 22.46              |
| 3   | 1.27(ddd, 14.13, 9, 3.9Hz) ; 1.51(m) | 42.64               | 11  | 1.44(m) ; 1.65(m)    | 27.74    | 19  | 2.21(m) ; 2.45(m) | 37.23               | 27  | 1.773 (3H, s)              | 16.24              |
| 4   | —                                    | 33.08               | 12  | 2.21(m) ; 2.42(m)    | 30.76    | 20  | 1.50(m) ; 1.61(m) | 30.14               | 28  | 1.731 (3H, s)              | 16.06              |
| 5   | 1.32(dd, 11.9, 4.9Hz)                | 50.37               | 13  | 5.45 (bt, 6.8Hz)     | 125.52   | 21  | 3.34 (bd, 9.5Hz)  | 78.28               | 29  | 1.145 (3H, s) <sup>b</sup> | 26.39 <sup>c</sup> |
| 6   | 1.99(m) ; 2.06(m)                    | 24.20               | 14  | —                    | 134.89   | 22  | —                 | 72.54               | 30  | 1.150 (3H, s) <sup>b</sup> | 23.58 <sup>c</sup> |
| 7   | 5.58(bs)                             | 122.54              | 15  | 2.25 (2H, t, 7.4 Hz) | 40.17    | 23  | 0.980 (3H, s)     | 33.35               |     |                            |                    |
| 8   | —                                    | 135.39 <sup>a</sup> | 16  | 2.34 (2H, m)         | 27.09    | 24  | 1.000 (3H, s)     | 22.03               |     |                            |                    |

The signals of a-c are exchangeable in respect to the same latters.

## Product 33

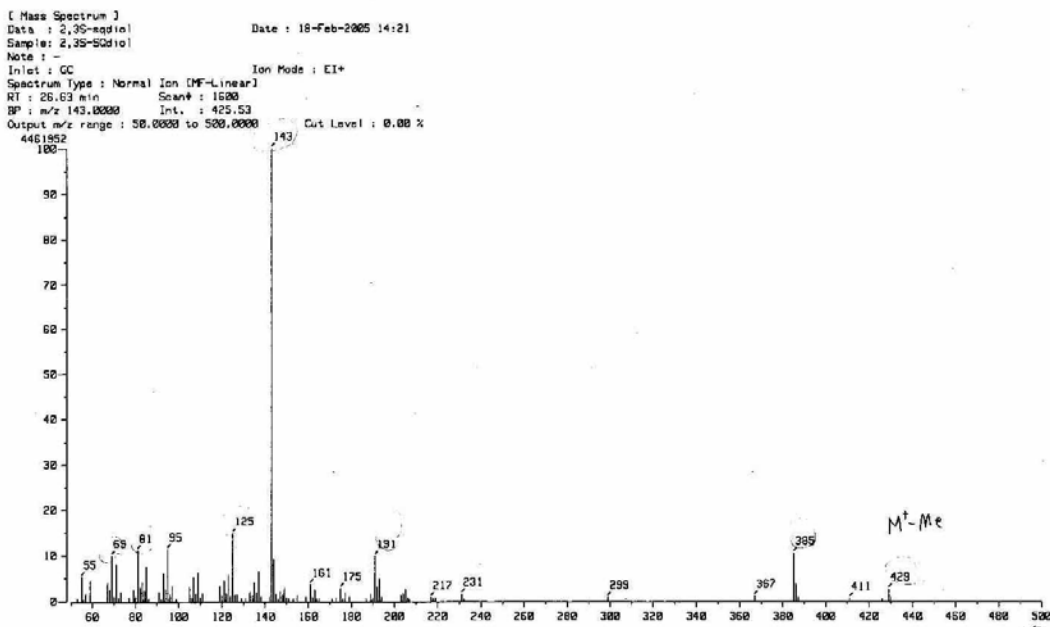

### NMR data of 33 in C<sub>6</sub>D<sub>6</sub>.

#### Product 33 from 2,3S-diol 18 in C<sub>6</sub>D<sub>6</sub>

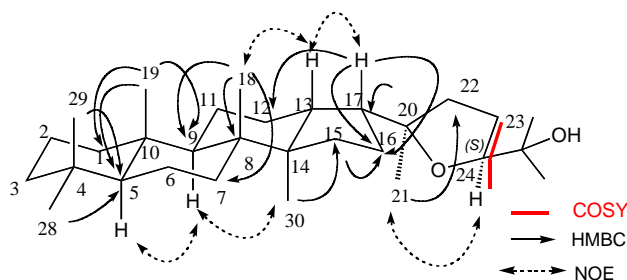

$[\alpha]_D^{25} = -72.5$  (EtOH)  
 $c = 0.090$

HREIMS:  $m/z$  ( $M^+ - Me$ ), calcd. for  
 $C_{29}H_{49}O_2$ , 429.3733; found, 429.3730.

600 MHz NMR data in C<sub>6</sub>D<sub>6</sub> (the solvent peak;  $\delta_H$  7.28,  $\delta_C$  128.0 ppm)

| NO. | <sup>1</sup> H      | <sup>13</sup> C    | NO. | <sup>1</sup> H    | <sup>13</sup> C | NO. | <sup>1</sup> H     | <sup>13</sup> C    | NO. | <sup>1</sup> H | <sup>13</sup> C    |
|-----|---------------------|--------------------|-----|-------------------|-----------------|-----|--------------------|--------------------|-----|----------------|--------------------|
| 1   | 0.87 (m); 1.75(m)   | 40.81              | 9   | 1.47 (m)          | 51.15           | 17  | 2.16(m)            | 48.66              | 25  | —              | 71.28              |
| 2   | 1.38(m); 1.50(m) c  | 19.12 <sup>b</sup> | 10  | —                 | 37.69           | 18  | 1.15 (3H,s)        | 16.13              | 26  | 1.276(3H,s) d  | 25.29 <sup>a</sup> |
| 3   | 1.30 (m); 1.52(m)   | 43.81              | 11  | 1.20(m); 1.66(m)  | 22.65           | 19  | 1.01 (3H,s)        | 16.47              | 27  | 1.448 (3H,s) d | 27.78 <sup>a</sup> |
| 4   | —                   | 33.54              | 12  | 1.549(m); 1.93(m) | 26.21           | 20  | —                  | 85.31              | 28  | 1.039 (3H, s)  | 33.63              |
| 5   | 0.919 (bd, 12.5Hz)  | 57.29 <sup>b</sup> | 13  | 2.07 (m)          | 43.81           | 21  | 1.273 (3H,s)       | 25.23 <sup>a</sup> | 29  | 0.998 (3H,s)   | 21.76              |
| 6   | 1.50 (m); 1.66(m) c | 19.08 <sup>b</sup> | 14  | —                 | 49.43           | 22  | 1.48 (m); 1.74 (m) | 38.22              | 30  | 1.151(3H,s)    | 17.20              |
| 7   | 1.38 (m); 1.68 (m)  | 35.63              | 15  | 1.22(m); 1.58 (m) | 32.72           | 23  | 1.74(m); 1.91(m)   | 25.79              |     |                |                    |
| 8   | —                   | 41.17              | 16  | 1.61(m); 1.82(m)  | 27.08           | 24  | 3.74(t, 7.3, 7.3)  | 83.98              |     |                |                    |

The signals of a~d are exchangeable in respect to the same letters.

## NMR data of **33** in Acetone $d_6$

Product **33** from 2,3S-diol **18**  
in acetone  $d_6$

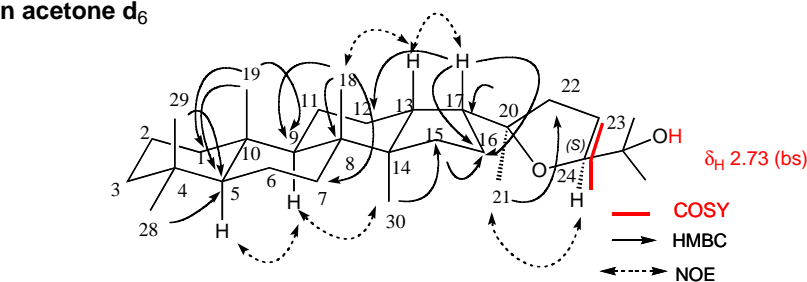

| NO. | $^1H$                         | $^{13}C$           | NO. | $^1H$              | $^{13}C$ | NO. | $^1H$             | $^{13}C$ | NO. | $^1H$                    | $^{13}C$           |
|-----|-------------------------------|--------------------|-----|--------------------|----------|-----|-------------------|----------|-----|--------------------------|--------------------|
| 1   | 0.87(m); 1.66(m)              | 41.32              | 9   | 1.43(dd,12.8, 3.0) | 51.70    | 17  | 2.25 (m)          | 49.20    | 25  | —                        | 71.62              |
| 2   | 1.36(m); 1.50(m) <sup>a</sup> | 19.44 <sup>b</sup> | 10  | —                  | 38.17    | 18  | 0.967(3H,s)       | 16.29    | 26  | 1.098(3H,s) <sup>c</sup> | 26.66 <sup>d</sup> |
| 3   | 1.16(m);1.35(m)               | 42.87              | 11  | 1.20(m);1.58(m)    | 23.09    | 19  | 0.859(3H, s)      | 16.62    | 27  | 1.128(3H,s) <sup>c</sup> | 26.33 <sup>d</sup> |
| 4   | —                             | 33.94              | 12  | 1.45(m);1.90(m)    | 26.66    | 20  | —                 | 85.75    | 28  | 0.848(3H, s)             | 33.75              |
| 5   | 0.82(m)                       | 57.75              | 13  | 2.10(m)            | 44.36    | 21  | 1.183(3H,s)       | 25.21    | 29  | 0.815(3H,s)              | 21.83              |
| 6   | 1.42(m);1.63(m) <sup>a</sup>  | 19.34 <sup>b</sup> | 14  | —                  | 49.95    | 22  | 1.56(m); 1.72(m)  | 38.45    | 30  | 1.023(3H,s)              | 17.42              |
| 7   | 1.26(m);1.59(m)               | 36.04              | 15  | 1.06(m); 1.45(m)   | 33.13    | 23  | 1.82(m);1.90(m)   | 26.20    | OH  | 2.73 (brs)               |                    |
| 8   | —                             | 41.63              | 16  | 1.62(m);1.72(m)    | 27.28    | 24  | 3.715(t, 7.3,7.3) | 84.60    |     |                          |                    |

The signal of a~d are exchangeable in respect to the same letters.

## Product **34**

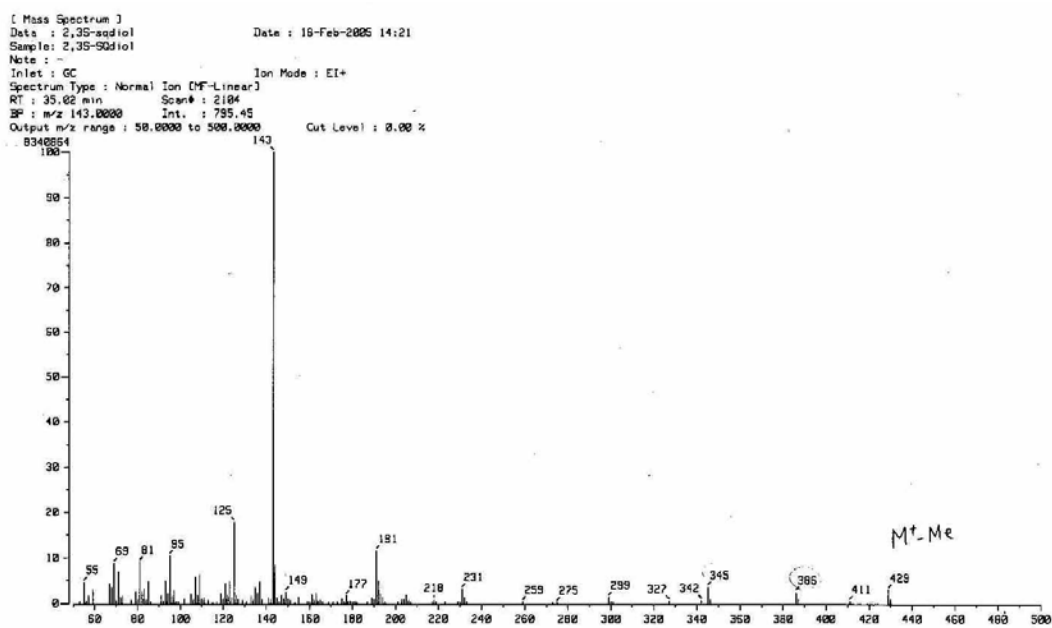



### NMR data of **34** in acetone $d_6$

Product **34** (solid) from diol **18**  
in acetone  $d_6$

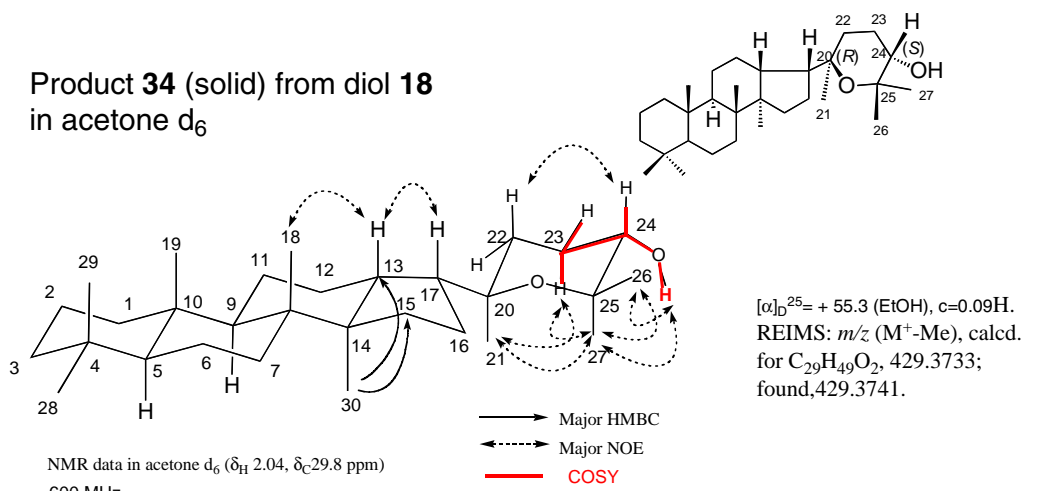

| NO. | <sup>1</sup> H    | <sup>13</sup> C    | NO. | <sup>1</sup> H    | <sup>13</sup> C | NO. | <sup>1</sup> H              | <sup>13</sup> C | NO. | <sup>1</sup> H | <sup>13</sup> C |
|-----|-------------------|--------------------|-----|-------------------|-----------------|-----|-----------------------------|-----------------|-----|----------------|-----------------|
| 1   | 0.87(m) ; 1.64(m) | 41.33              | 9   | 1.44(m)           | 51.62           | 17  | 1.93 (ddd, 9.3, 8.5, 7.8)   | 51.41           | 25  | —              | 75.83           |
| 2   | 1.41(m) ; 1.62(m) | 19.21 <sup>a</sup> | 10  | —                 | 38.14           | 18  | 0.946(3H, s)                | 16.28           | 26  | 1.151 (3H, s)  | 22.49           |
| 3   | 1.15(m) ; 1.35(m) | 42.89              | 11  | 1.17(m) ; 1.56(m) | 23.22           | 19  | 0.853(3H, s)                | 16.61           | 27  | 1.179 (3H, s)  | 30.49           |
| 4   | —                 | 33.93              | 12  | 1.56(m) ; 2.02(m) | 26.95           | 20  | —                           | 75.83           | 28  | 0.845 (3H, s)  | 33.75           |
| 5   | 0.82(m)           | 57.80 <sup>a</sup> | 13  | 2.04(m)           | 44.83           | 21  | 1.284 (3H, s)               | 27.53           | 29  | 0.813(3H, s)   | 21.83           |
| 6   | 1.39(m) ; 1.51(m) | 19.12              | 14  | —                 | 49.74           | 22  | 1.68(m, ax) ; 1.32(m, eq)   | 35.05           | 30  | 1.034(3H, s)   | 17.29           |
| 7   | 1.23(m) ; 1.59(m) | 36.07              | 15  | 1.03(m) ; 1.38(m) | 33.11           | 23  | 1.60(m, ax) ; 1.78(m, eq)   | 25.89           |     |                |                 |
| 8   | —                 | 41.61              | 16  | 1.40(m) ; 1.59(m) | 27.71           | 24  | 3.28(ddd, 11.5, 4.4, 4.4Hz) | 75.36           |     |                |                 |

a: Assignments of C2 and C6 are exchangeable.

### NMR data of **34** in $C_6D_6$

Product **34** (solid) from diol **18**  
in  $C_6D_6$

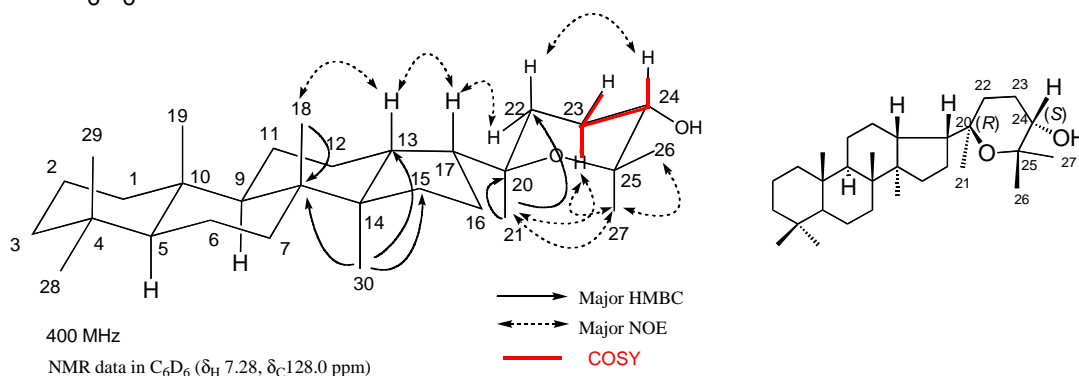

| NO. | <sup>1</sup> H       | <sup>13</sup> C    | NO. | <sup>1</sup> H    | <sup>13</sup> C | NO. | <sup>1</sup> H            | <sup>13</sup> C | NO. | <sup>1</sup> H | <sup>13</sup> C |
|-----|----------------------|--------------------|-----|-------------------|-----------------|-----|---------------------------|-----------------|-----|----------------|-----------------|
| 1   | 0.94(m) ; 1.78(m)    | 40.89              | 9   | 1.62(m)           | 51.17           | 17  | 1.91 (m)                  | 51.86           | 25  | —              | 75.07           |
| 2   | 1.50(m) ; 1.75(m)    | 19.21 <sup>b</sup> | 10  | —                 | 37.74           | 18  | 1.123(3H, s)              | 16.19           | 26  | 1.32 (3H, s)   | 22.02           |
| 3   | 1.28(m) ; 1.52(m)    | 42.54              | 11  | 1.35(m) ; 1.74(m) | 22.88           | 19  | 1.03 (3H, s)              | 16.49           | 27  | 1.419(3H, s)   | 30.11           |
| 4   | —                    | 33.56              | 12  | 1.77(m) ; 2.18(m) | 26.58           | 20  | —                         | 75.32           | 28  | 1.03 (3H, s)   | 33.65           |
| 5   | 0.973(dd, 12.0, 2.4) | 57.42              | 13  | 2.14(m)           | 44.33           | 21  | 1.336 (3H, s)             | 27.25           | 29  | 1.004(3H, s)   | 21.78           |
| 6   | 1.55(m) ; 1.78(m)    | 19.12 <sup>b</sup> | 14  | —                 | 49.38           | 22  | 1.22(m) ; 1.68(m)         | 34.63           | 30  | 1.29(3H, s)    | 17.14           |
| 7   | 1.44(m) ; 1.78(m)    | 35.78              | 15  | 1.30(m) ; 1.58(m) | 32.84           | 23  | 1.46(m, ax) ; 1.68(m, eq) | 25.57           |     |                |                 |
| 8   | —                    | 41.23              | 16  | 1.66(m) ; 1.74(m) | 27.49           | 24  | 3.22(ddd, 11.5, 4.4Hz)    | 75.32           |     |                |                 |

Assignments of carbon and proton signals at C2 and C6 are exchangeable.

## Product 35

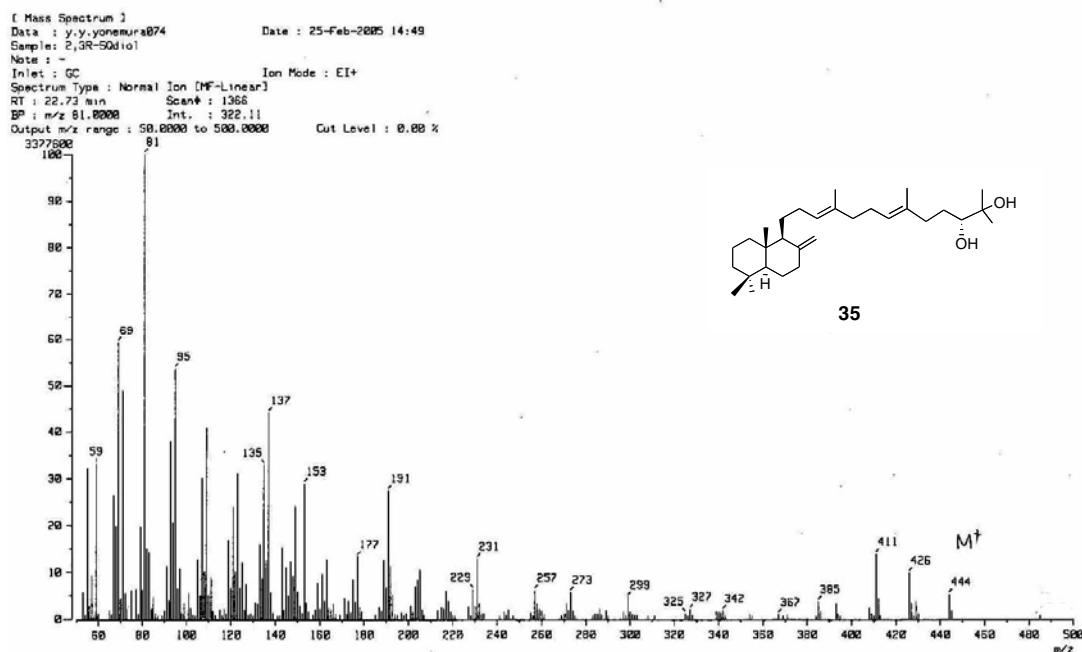

## Product 35 from diol 19

The NMR signals in C<sub>6</sub>D<sub>6</sub> were identical to those of product **31**.  $[\alpha]_D^{25} = +22.8$  (EtOH),  $c=0.28$ . HREIMS:  $m/z$  ( $M^+$ ), calcd. for C<sub>30</sub>H<sub>52</sub>O<sub>2</sub>, 444.3967; found, 444.3961.

**Product 36 from diol 19.** The NMR signals were the same as those of product 32.  $[\alpha]_{\text{D}}^{25} = +4.08$  (EtOH),  $c = 0.29$ . HREIMS:  $m/z$  ( $\text{M}^+$ ), calcd. for  $\text{C}_{30}\text{H}_{52}\text{O}_2$ , 444.3967; found, 444.3979.

## Product 37

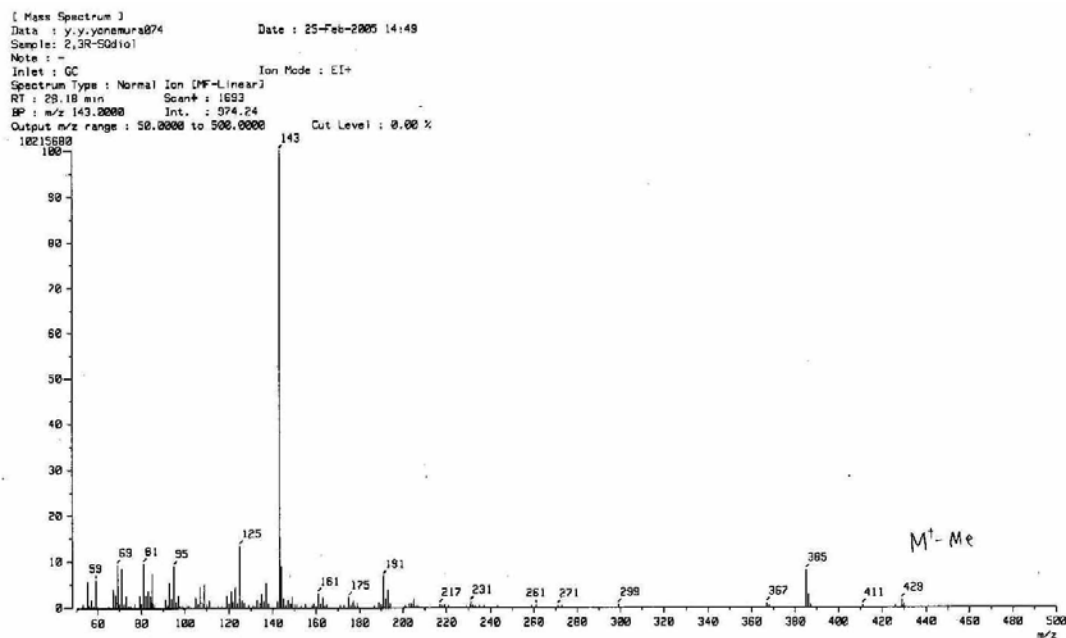

NMR data of Product **37** in  $C_6D_6$ .

### Product **37** (oil) from **19** in $C_6D_6$

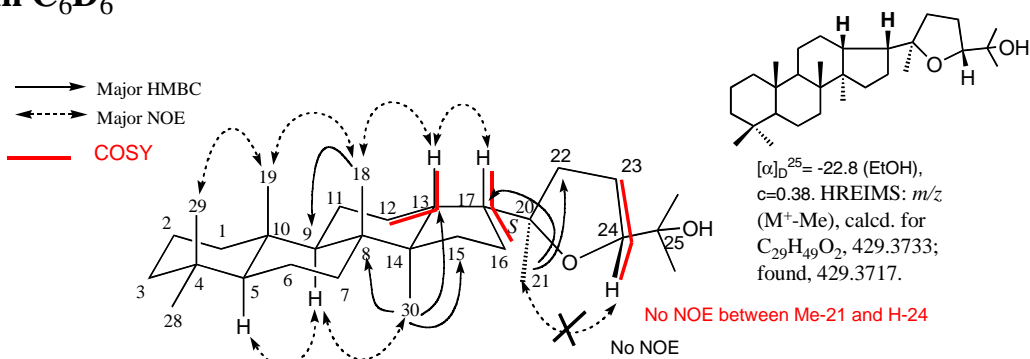

NMR data in  $C_6D_6$  ( $\delta_H$  7.28,  $\delta_C$  128 ppm)

| NO. | $^1H$                         | $^{13}C$                  | NO. | $^1H$                          | $^{13}C$     | NO. | $^1H$                 | $^{13}C$     | NO. | $^1H$                     | $^{13}C$                  |
|-----|-------------------------------|---------------------------|-----|--------------------------------|--------------|-----|-----------------------|--------------|-----|---------------------------|---------------------------|
| 1   | 0.96(m) ; 1.77 (m)            | <b>40.89</b>              | 9   | 1.57(m)                        | <b>51.15</b> | 17  | 2.17(m)               | <b>48.73</b> | 25  | —                         | <b>69.83</b>              |
| 2   | 1.52(m); 1.72(m) <sup>a</sup> | <b>19.16</b> <sup>b</sup> | 10  | —                              | <b>37.74</b> | 18  | 1.110(3H,s)           | <b>16.15</b> | 26  | 1.231 (3H,s) <sup>c</sup> | <b>24.64</b> <sup>d</sup> |
| 3   | 1.31(m); 1.54 (m)             | <b>42.48</b>              | 11  | 1.26(m); 1.70(m)               | <b>22.76</b> | 19  | 1.027(3H, s)          | <b>16.49</b> | 27  | 1.405(3H,s) <sup>c</sup>  | <b>28.36</b> <sup>d</sup> |
| 4   | —                             | <b>33.55</b>              | 12  | 1.56(m);1.96 (m)               | <b>25.80</b> | 20  | —                     | <b>85.51</b> | 28  | 1.048(3H,s)               | <b>33.68</b>              |
| 5   | 0.96(brd, 12.4 Hz)            | <b>57.36</b>              | 13  | 2.10 (ddd,<br>11.5,10.8,3.2Hz) | <b>44.03</b> | 21  | 1.231 (3H,s)          | <b>28.65</b> | 29  | 1.008 (3H, s)             | <b>21.78</b>              |
| 6   | 1.52(m); 1.63(m) <sup>a</sup> | <b>19.10</b> <sup>b</sup> | 14  | —                              | <b>49.36</b> | 22  | 1.48 (m); 1.85(m)     | <b>38.28</b> | 30  | 1.196 (3H, s)             | <b>16.65</b>              |
| 7   | 1.43(m); 1.78(m)              | <b>35.73</b>              | 15  | 1.26(m);1.57(m)                | <b>32.76</b> | 23  | 1.56(m);1.96 (m)      | <b>26.48</b> |     |                           |                           |
| 8   | —                             | <b>41.20</b>              | 16  | 1.61 (m);1.82(m)               | <b>27.99</b> | 24  | 3.67 (dd, 10.5,5.0Hz) | <b>87.59</b> |     |                           |                           |

The signals of a~d are exchangeable in respect to the same letters.

### NMR data of Product 37 in Acetone d<sub>6</sub>

#### Product 37 (oil) from 19 in acetone d<sub>6</sub>

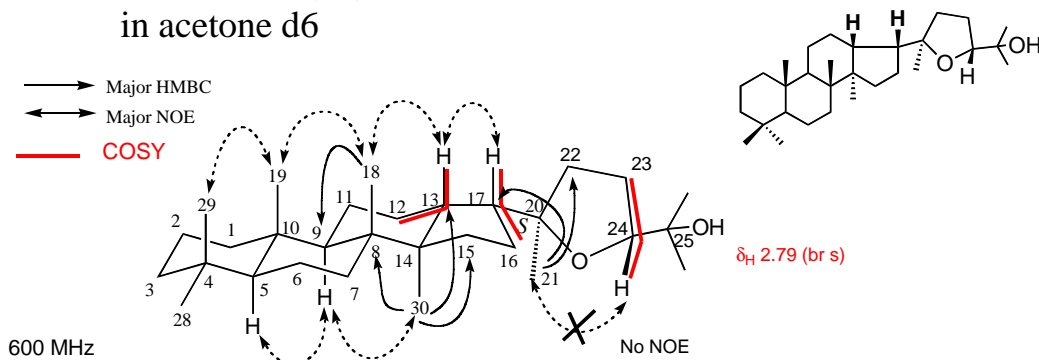

| NO. | <sup>1</sup> H                | <sup>13</sup> C    | NO. | <sup>1</sup> H          | <sup>13</sup> C | NO. | <sup>1</sup> H        | <sup>13</sup> C | NO. | <sup>1</sup> H            | <sup>13</sup> C    |
|-----|-------------------------------|--------------------|-----|-------------------------|-----------------|-----|-----------------------|-----------------|-----|---------------------------|--------------------|
| 1   | 0.89(m); 1.66 (brd, 13.0 Hz)  | 41.30              | 9   | 1.44 (m)                | 51.64           | 17  | 2.25 (m)              | 49.30           | 25  | —                         | 70.44              |
| 2   | 1.38(m); 1.62(m) <sup>a</sup> | 19.43 <sup>b</sup> | 10  | —                       | 38.13           | 18  | 0.970(3H,s)           | 16.30           | 26  | 1.055 (3H,s) <sup>c</sup> | 25.84 <sup>d</sup> |
| 3   | 1.15(m); 1.36 (brd, 12.8 Hz)  | 42.83              | 11  | 1.20(m); 1.58(m)        | 23.17           | 19  | 0.861 (3H,s)          | 16.38           | 27  | 1.159(3H,s) <sup>c</sup>  | 27.28 <sup>d</sup> |
| 4   | —                             | 33.91              | 12  | 1.52(m); 1.93 (m)       | 26.78           | 20  | —                     | 86.01           | 28  | 0.851(3H,s)               | 33.75              |
| 5   | 0.82(m)                       | 57.75              | 13  | 2.10 (ddd, 11,10,3.2Hz) | 44.53           | 21  | 1.188(3H, s)          | 28.87           | 29  | 0.818(3H,s)               | 21.85              |
| 6   | 1.41(m); 1.54(m) <sup>a</sup> | 19.33 <sup>b</sup> | 14  | —                       | 49.80           | 22  | 1.58 (m); 1.91(m)     | 38.65           | 30  | 1.024 (3H, s)             | 16.92              |
| 7   | 1.26(m); 1.61(m)              | 36.04              | 15  | 1.05(m); 1.44(m)        | 33.08           | 23  | 1.75 (m); 1.84(m)     | 26.37           | OH  | 2.79 (br s)               |                    |
| 8   | —                             | 41.62              | 16  | 1.54 (m); 1.77(m)       | 28.25           | 24  | 3.71 (dd, 10.5,5.2Hz) | 88.16           |     |                           |                    |

The signals of a-d are exchangeable in respect to the same letters.

### Product 38

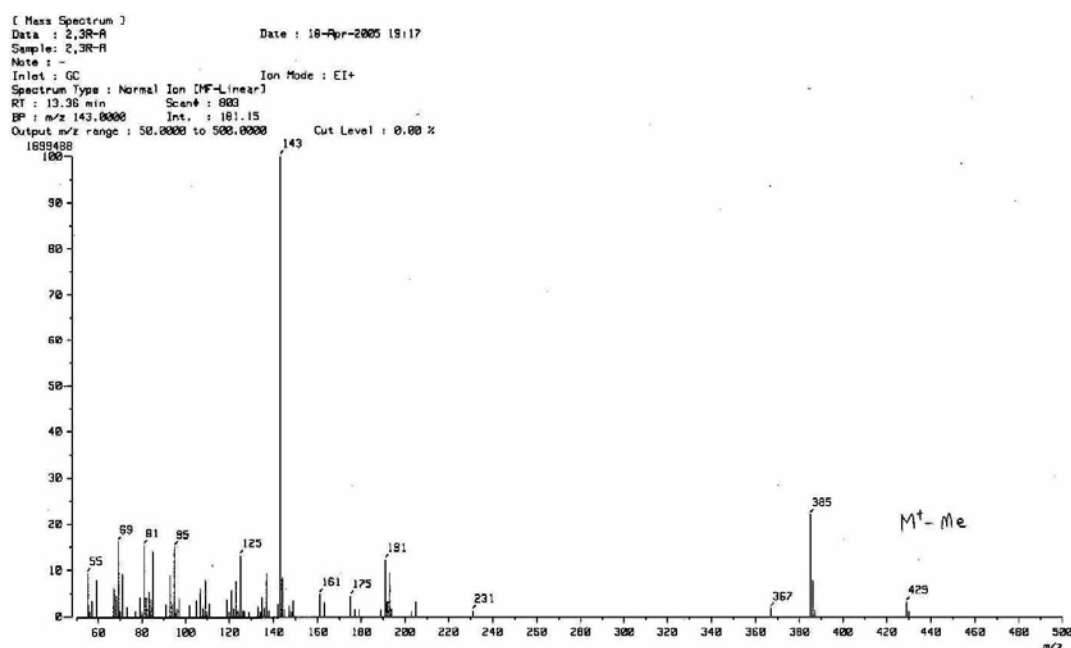

### NMR data of 38 in C<sub>6</sub>D<sub>6</sub>.

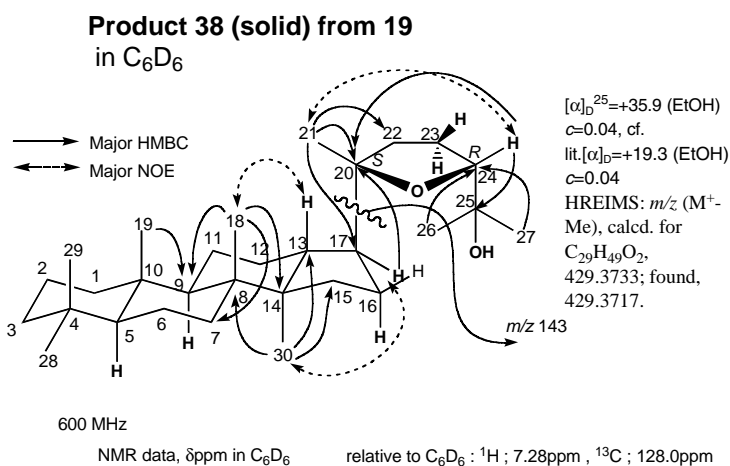

| <sup>1</sup> H- and <sup>13</sup> C-Chemical Shift ( $\delta$ ) in CDCl <sub>3</sub> |                |                 |
|--------------------------------------------------------------------------------------|----------------|-----------------|
|                                                                                      | our experiment | reference value |
| H-18                                                                                 | 0.954          | 0.953           |
| H-19                                                                                 | 0.835          | 0.834           |
| H-21                                                                                 | 1.128          | 1.128           |
| H-26                                                                                 | 1.118          | 1.118           |
| H-27                                                                                 | 1.208          | 1.209           |
| H-28                                                                                 | 0.846          | 0.846           |
| H-29                                                                                 | 0.802          | 0.801           |
| H-30                                                                                 | 0.881          | 0.881           |
| C-17                                                                                 | 49.59          | 49.57           |
| C-20                                                                                 | 86.49          | 86.47           |
| C-21                                                                                 | 23.49          | 23.50           |
| C-24                                                                                 | 83.33          | 83.32           |
| C-25                                                                                 | 71.46          | 71.44           |
| C-26                                                                                 | 27.49          | 27.49           |
| C-27                                                                                 | 24.26          | 24.27           |

Reference: Yamashita *et al*,  
*Phytochemistry*, **49**, 2461-2466 (1998)

| NO. | <sup>1</sup> H          | <sup>13</sup> C | NO. | <sup>1</sup> H   | <sup>13</sup> C | NO. | <sup>1</sup> H   | <sup>13</sup> C | NO. | <sup>1</sup> H             | <sup>13</sup> C    |
|-----|-------------------------|-----------------|-----|------------------|-----------------|-----|------------------|-----------------|-----|----------------------------|--------------------|
| 1   | 0.873(m); 1.70(m)       | 40.85           | 9   | 1.48 (m)         | 51.30           | 17  | 1.94(m)          | 50.04           | 25  | —                          | 71.08              |
| 2   | 1.52(m); 1.73(m)        | 19.05           | 10  | —                | 37.70           | 18  | 1.111 (3H, s)    | 15.69           | 26  | 1.263 (3H, s) <sup>c</sup> | 25.04 <sup>d</sup> |
| 3   | 1.28(m); 1.50(m)        | 42.43           | 11  | 1.30(m); 1.64(m) | 21.76           | 19  | 0.972 (3H, s)    | 16.45           | 27  | 1.434 (3H, s) <sup>c</sup> | 27.77 <sup>d</sup> |
| 4   | —                       | 33.52           | 12  | 1.33(m); 1.98(m) | 27.83           | 20  | —                | 86.27           | 28  | 1.029 (3H, s)              | 33.63              |
| 5   | 0.909 (dd, 13.4, 2.6Hz) | 57.31           | 13  | 1.77(m)          | 43.25           | 21  | 1.222 (3H, s)    | 23.66           | 29  | 0.982 (3H, s) <sup>e</sup> | 21.76 <sup>f</sup> |
| 6   | 1.48(m); 1.64(m)        | 18.97           | 14  | —                | 50.37           | 22  | 1.55(m); 1.79(m) | 36.19           | 30  | 0.987 (3H, s) <sup>e</sup> | 16.70 <sup>f</sup> |
| 7   | 1.38(m); 1.68(m)        | 35.64           | 15  | 1.18(m); 1.60(m) | 31.80           | 23  | 1.72(m); 1.92(m) | 26.02           |     |                            |                    |
| 8   | —                       | 40.85           | 16  | 1.66(m); 1.91(m) | 26.26           | 24  | 3.75 (t, 7.3Hz)  | 83.69           |     |                            |                    |

The signals of a~f are exchangeable in respect to the same letters.

### NMR data of 38 in Acetone d<sub>6</sub>

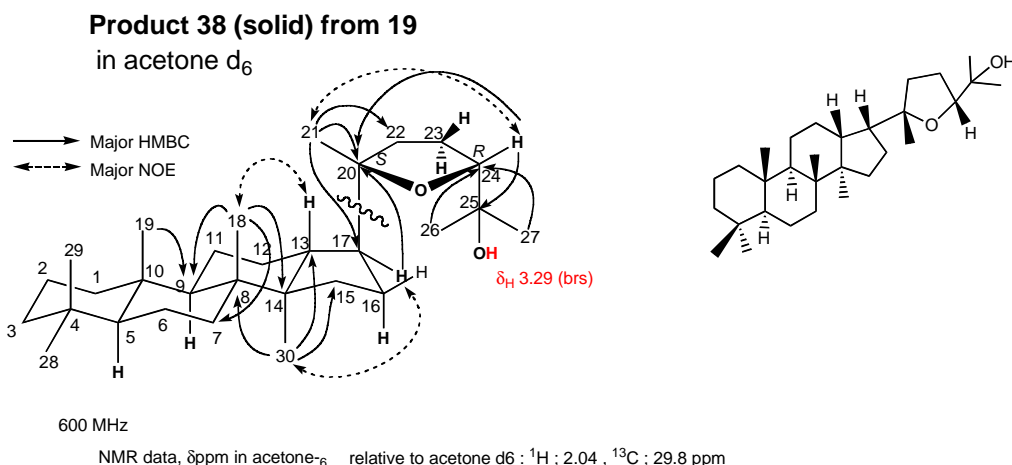

| NO. | <sup>1</sup> H                | <sup>13</sup> C    | NO. | <sup>1</sup> H   | <sup>13</sup> C | NO. | <sup>1</sup> H   | <sup>13</sup> C | NO. | <sup>1</sup> H | <sup>13</sup> C |
|-----|-------------------------------|--------------------|-----|------------------|-----------------|-----|------------------|-----------------|-----|----------------|-----------------|
| 1   | 0.84(m); 1.66(m)              | 41.33              | 9   | 1.41(m)          | 51.75           | 17  | 1.78(m)          | 50.56           | 25  | —              | 71.49           |
| 2   | 1.38(m); 1.62(m) <sup>a</sup> | 19.31 <sup>b</sup> | 10  | —                | 38.17           | 18  | 0.985(3H,s)      | 15.89           | 26  | 1.082(3H,s)    | 26.73           |
| 3   | 1.13(m); 1.32(m)              | 42.83              | 11  | 1.20(m); 1.52(m) | 22.09           | 19  | 0.865(3H,s)      | 16.61           | 27  | 1.086(3H,s)    | 26.29           |
| 4   | —                             | 33.73              | 12  | 1.20(m); 1.85(m) | 28.00           | 20  | —                | 86.68           | 28  | 0.847(m)       | 33.91           |
| 5   | 0.82 (m)                      | 57.72              | 13  | 1.63(m)          | 43.56           | 21  | 1.096(3H,s)      | 23.45           | 29  | 0.815(3H,s)    | 21.82           |
| 6   | 1.40(m); 1.52(m) <sup>a</sup> | 19.28 <sup>b</sup> | 14  | —                | 50.78           | 22  | 1.61(m); 1.68(m) | 36.36           | 30  | 0.896(3H,s)    | 16.81           |
| 7   | 1.26(m); 1.57(m)              | 36.01              | 15  | 1.06(m); 1.51(m) | 32.09           | 23  | 1.80(m); 1.88(m) | 26.33           |     |                |                 |
| 8   | —                             | 41.33              | 16  | 1.50(m); 1.66(m) | 26.33           | 24  | 3.71 (t, 7.3Hz)  | 84.21           |     |                |                 |

The proton and carbon signals of a and b are exchangeable.

## Product 39

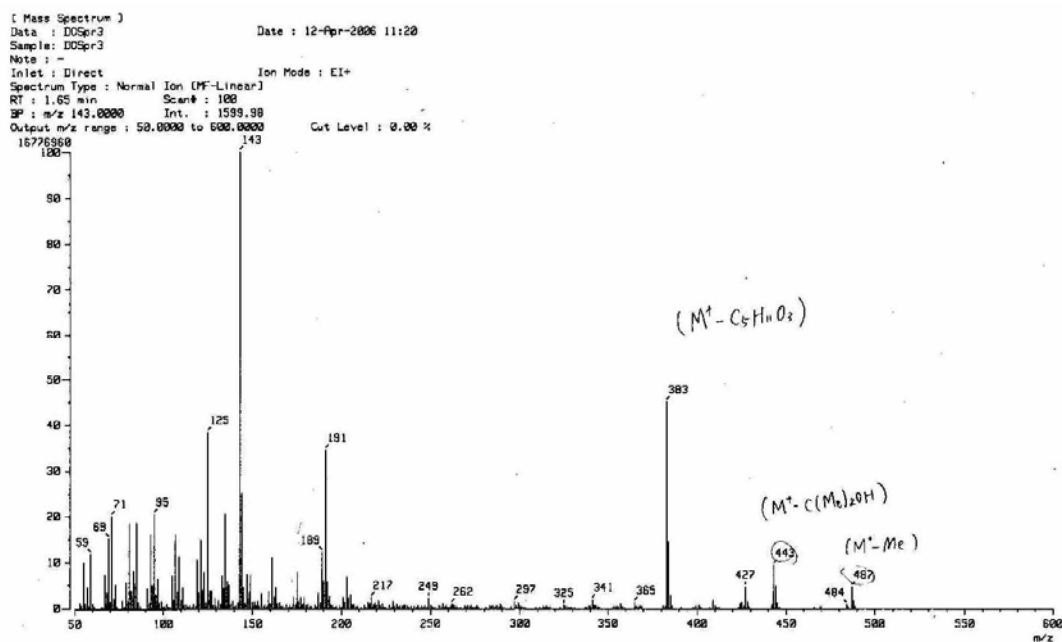

*NMR data of 39 acetate in CDCl<sub>3</sub>.*

**Product 39 (solid) acetate from 20 in CDCl<sub>3</sub>**

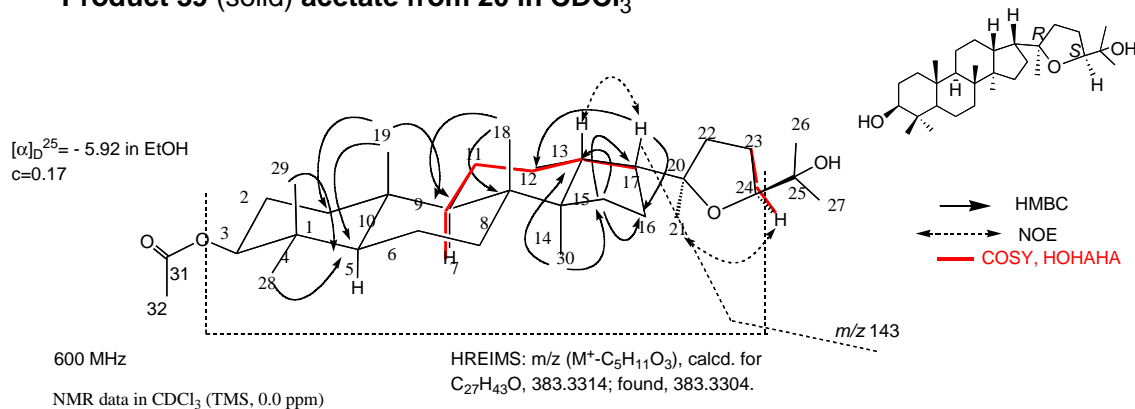

| NO. | <sup>1</sup> H                          | <sup>13</sup> C | NO. | <sup>1</sup> H          | <sup>13</sup> C    | NO. | <sup>1</sup> H                | <sup>13</sup> C    | NO. | <sup>1</sup> H             | <sup>13</sup> C    |
|-----|-----------------------------------------|-----------------|-----|-------------------------|--------------------|-----|-------------------------------|--------------------|-----|----------------------------|--------------------|
| 1   | 1.04 (dd, 12.5, 12.5, 4.5 Hz); 1.68 (m) | 38.68           | 9   | 1.34 (dd, 12.7, 2.6 Hz) | 50.65              | 17  | 2.23 (ddd, 8.9, 9.0, 11.0 Hz) | 48.59              | 25  | —                          | 71.55              |
| 2   | 1.61 (2H, m)                            | 23.71           | 10  | —                       | 37.90              | 18  | 0.935 (3H, s)                 | 15.82 <sup>a</sup> | 26  | 1.119 (3H, s) <sup>d</sup> | 24.46 <sup>c</sup> |
| 3   | 4.48 (dd, 11.1, 5.1 Hz)                 | 80.94           | 11  | 1.17 (m); 1.53 (m)      | 22.51 <sup>b</sup> | 19  | 0.846 (3H, s)                 | 16.46              | 27  | 1.217 (3H, s) <sup>d</sup> | 27.43 <sup>c</sup> |
| 4   | —                                       | 37.06           | 12  | 1.43 (m); 1.86 (m)      | 25.76              | 20  | —                             | 85.45              | 28  | 0.854 (3H, s)              | 27.94 <sup>a</sup> |
| 5   | 0.84 (m)                                | 55.96           | 13  | 2.07 (m)                | 43.49              | 21  | 1.189 (3H, s)                 | 24.88              | 29  | 0.846 (3H, s)              | 16.27 <sup>a</sup> |
| 6   | 1.43 (m); 1.53 (m)                      | 18.23           | 14  | —                       | 49.16              | 22  | 1.6 (m); 1.73 (m)             | 37.93              | 30  | 0.963 (3H, s)              | 16.90              |
| 7   | 1.26 (bd, 12.7 Hz)                      | 35.21           | 15  | 1.10 (m); 1.43 (m)      | 32.44              | 23  | 1.77 (m); 1.84 (m)            | 25.63 <sup>b</sup> | 31  | —                          | 170.9              |
| 8   | —                                       | 40.75           | 16  | 1.75 (m); 1.58 (m)      | 26.85              | 24  | 3.714 (t, 6.8 Hz)             | 83.43              | 32  | 2.044 (3H, s)              | 21.30              |

The carbon signals of a~c are exchangeable each other in respect to the same letters.  
The protons designated as d is interchangeable.

### NMR data of 39 acetate in Acetone d<sub>6</sub>.

#### Product 39 acetate (solid) from 20 in Acetone d<sub>6</sub>

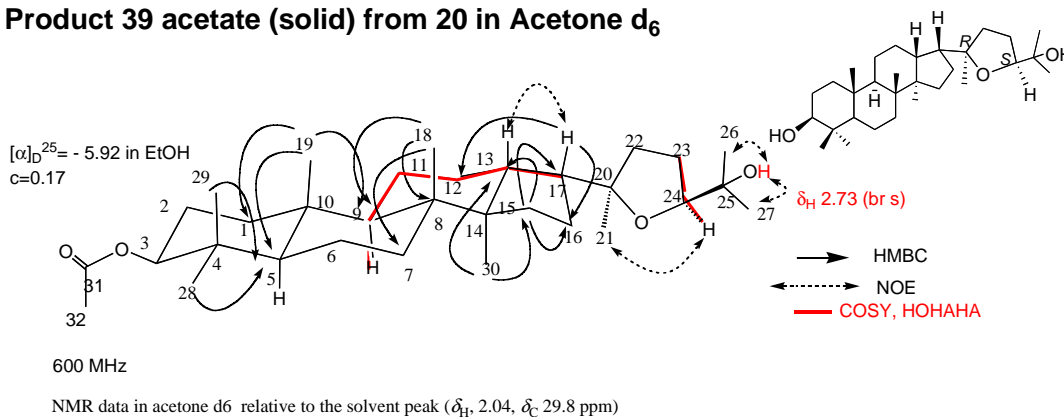

| NO. | <sup>1</sup> H        | <sup>13</sup> C | NO. | <sup>1</sup> H   | <sup>13</sup> C | NO. | <sup>1</sup> H   | <sup>13</sup> C    | NO. | <sup>1</sup> H | <sup>13</sup> C    |
|-----|-----------------------|-----------------|-----|------------------|-----------------|-----|------------------|--------------------|-----|----------------|--------------------|
| 1   | 1.06(m);1.68(m)       | 39.33           | 9   | 1.46(m)          | 51.39           | 17  | 2.25(m)          | 49.19              | 25  | —              | 71.60              |
| 2   | 1.62(2H, m)           | 24.42           | 10  | —                | 38.53           | 18  | 0.971(3H,s)      | 16.19 <sub>a</sub> | 26  | 1.09 (3H, s)   | 26.71 <sup>b</sup> |
| 3   | 4.43(dd,11.3, 5.0Hz)  | 80.99           | 11  | 1.21(m);1.57(m)  | 23.22           | 19  | 0.887(3H,s)      | 16.83              | 27  | 1.13(3H,s)     | 26.32 <sup>b</sup> |
| 4   | —                     | 37.79           | 12  | 1.46(m); 1.90(m) | 26.58           | 20  | —                | 85.75              | 28  | 0.841(3H,s)    | 28.24 <sup>a</sup> |
| 5   | 0.91(dd, 11.7, 2.5Hz) | 55.63           | 13  | 2.11(m)          | 44.41           | 21  | 1.183 (3H,s)     | 25.19              | 29  | 0.852 (3H,s)   | 16.65 <sup>a</sup> |
| 6   | 1.47(m); 1.52(m)      | 18.98           | 14  | —                | 49.89           | 22  | 1.55(m); 1.71(m) | 38.43              | 30  | 1.030(3H,s)    | 17.37              |
| 7   | 1.26(m);1.61(m)       | 35.96           | 15  | 1.08(m);1.45(m)  | 33.17           | 23  | 1.81(m);1.86(m)  | 26.18              | 31  | —              | 170.9              |
| 8   | —                     | 41.43           | 16  | 1.63(m);1.73(m)  | 27.27           | 24  | 3.72 (t, 7.3 Hz) | 84.59              | 32  | 1.979(3H,s)    | 21.04              |

The carbon signals of a and b are exchangeable each other.

### Product 40

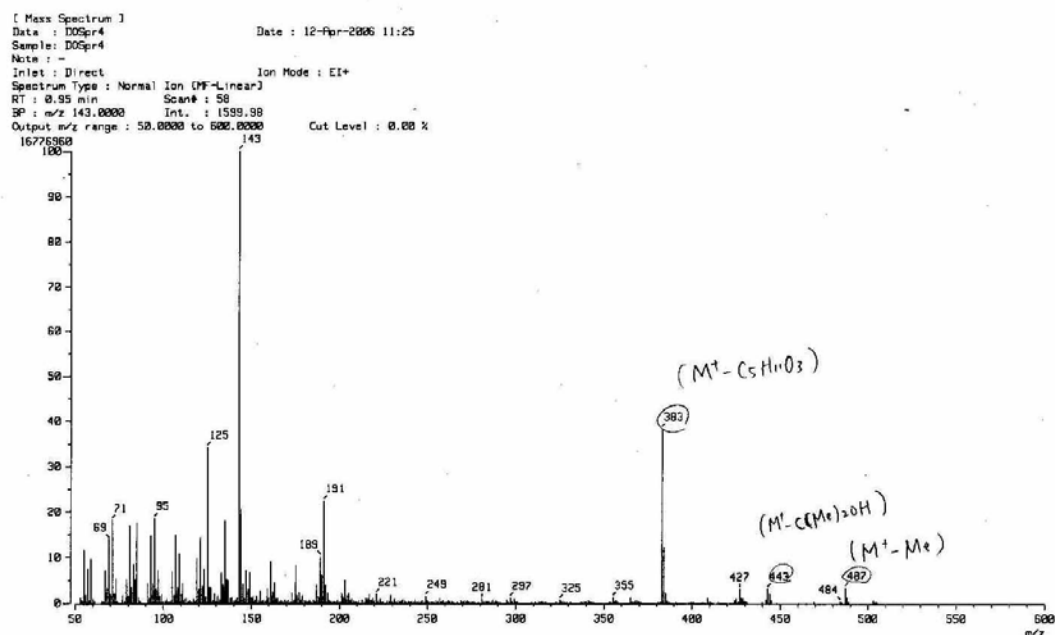



### *NMR data of 40 acetate in CDCl<sub>3</sub>.*

Product 40 acetate (oil) from 21 in CDCl<sub>3</sub>

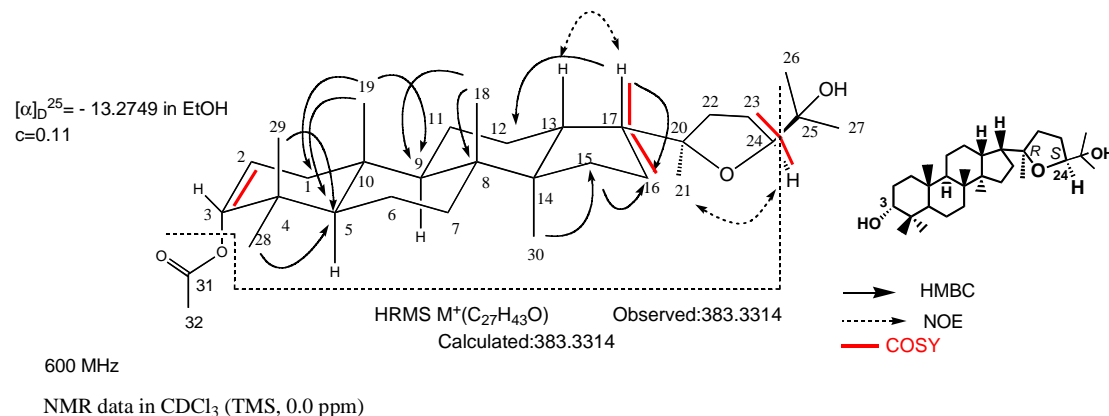

| NO. | <sup>1</sup> H  | <sup>13</sup> C | NO. | <sup>1</sup> H   | <sup>13</sup> C    | NO. | <sup>1</sup> H   | <sup>13</sup> C    | NO. | <sup>1</sup> H            | <sup>13</sup> C    |
|-----|-----------------|-----------------|-----|------------------|--------------------|-----|------------------|--------------------|-----|---------------------------|--------------------|
| 1   | 1.15(m);1.42(m) | 34.25           | 9   | 1.44(m)          | 50.52              | 17  | 2.25(m)          | 48.52              | 25  | —                         | 71.59              |
| 2   | 1.57(m);1.87(m) | 22.91           | 10  | —                | 37.17              | 18  | 0.946(3H,s)      | 16.02 <sup>b</sup> | 26  | 1.223(3H,s) <sup>d</sup>  | 27.45 <sup>c</sup> |
| 3   | 4.62(bs)        | 78.42           | 11  | 1.16(m); 1.58(m) | 22.35 <sup>a</sup> | 19  | 0.852(3H,s)      | 15.87 <sup>b</sup> | 27  | 1.104 (3H,s) <sup>d</sup> | 24.43 <sup>c</sup> |
| 4   | —               | 36.77           | 12  | 1.57(m);1.85(m)  | 25.77 <sup>a</sup> | 20  | —                | 85.45              | 28  | 0.835(3H,s)               | 27.86              |
| 5   | 1.23(m)         | 50.77           | 13  | 2.06(m)          | 43.51              | 21  | 1.989(3H,s)      | 25.01              | 29  | 0.881(3H,s)               | 21.73              |
| 6   | 1.42(2H, m)     | 18.22           | 14  | —                | 49.28              | 22  | 1.60(m); 1.76(m) | 37.94              | 30  | 1.024(3H,s)               | 17.13              |
| 7   | 1.26(m);1.59(m) | 35.12           | 15  | 1.10(m);1.45(m)  | 32.46              | 23  | 1.76(m);1.87(m)  | 25.70 <sup>a</sup> | 31  | —                         | 170.8              |
| 8   | —               | 40.94           | 16  | 1.58(m);1.75(m)  | 26.83              | 24  | 3.72 (t, 7.2Hz)  | 83.49              | 32  | 2.09(3H,s)                | 21.40              |

The signals of a–d are exchangeable each other in respect to the same letters.

### *NMR data of 40 acetate in Acetone d<sub>6</sub>.*

Product 40 acetate (oil) from 21 in acetone d<sub>6</sub>

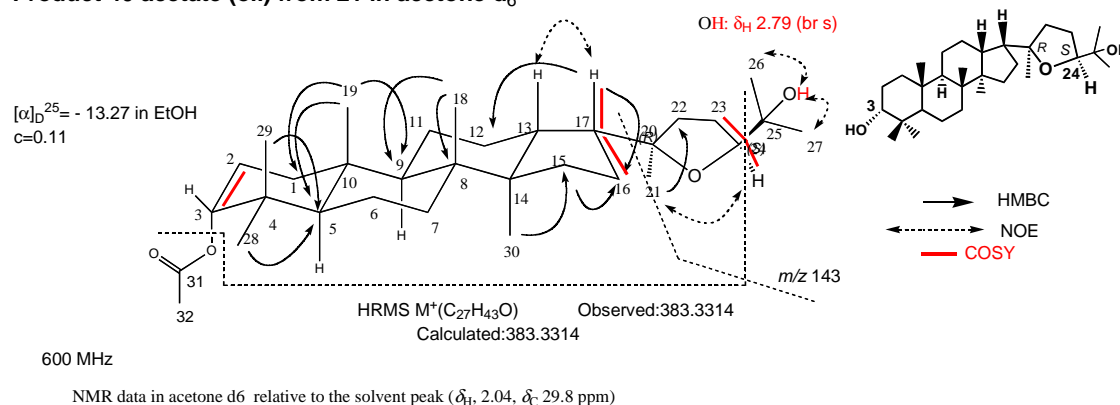

| NO. | <sup>1</sup> H  | <sup>13</sup> C | NO. | <sup>1</sup> H   | <sup>13</sup> C | NO. | <sup>1</sup> H            | <sup>13</sup> C | NO. | <sup>1</sup> H           | <sup>13</sup> C    |
|-----|-----------------|-----------------|-----|------------------|-----------------|-----|---------------------------|-----------------|-----|--------------------------|--------------------|
| 1   | 1.23(m);1.43(m) | 34.99           | 9   | 1.50 (m)         | 51.41           | 17  | 2.25(m)                   | 49.16           | 25  | —                        | 71.61              |
| 2   | 1.50(m);1.90(m) | 23.53           | 10  | —                | 37.89           | 18  | 0.980(3H,s)               | 16.23           | 26  | 1.054(3H,s) <sup>b</sup> | 26.71 <sup>c</sup> |
| 3   | 4.56 (br s)     | 78.42           | 11  | 1.21(m); 1.58(m) | 23.04           | 19  | 0.893 (3H,s) <sup>a</sup> | 19.40           | 27  | 1.133(3H,s) <sup>b</sup> | 26.34 <sup>c</sup> |
| 4   | —               | 37.41           | 12  | 1.46(m);1.90(m)  | 26.58           | 20  | —                         | 85.75           | 28  | 0.832(3H,s)              | 28.27              |
| 5   | 1.31(m)         | 51.63           | 13  | 2.11 (m)         | 44.36           | 21  | 1.191(3H,s)               | 25.23           | 29  | 0.898(3H,s) <sup>a</sup> | 22.05              |
| 6   | 1.45(m)         | 18.89           | 14  | —                | 49.94           | 22  | 1.58(m);1.74(m)           | 38.44           | 30  | 1.044(3H,s)              | 17.50              |
| 7   | 1.27(m);1.62(m) | 35.92           | 15  | 1.08(m);1.45(m)  | 33.13           | 23  | 1.82(m);1.90(m)           | 26.19           | 31  | —                        | 170.5              |
| 8   | —               | 41.59           | 16  | 1.63(m);1.74(m)  | 27.25           | 24  | 3.72 (t, 7.2 Hz)          | 84.63           | 32  | 2.00 (3H,s)              | 21.10              |

The signals of a–c are exchangeable in respect to the same letters.

## Product 41

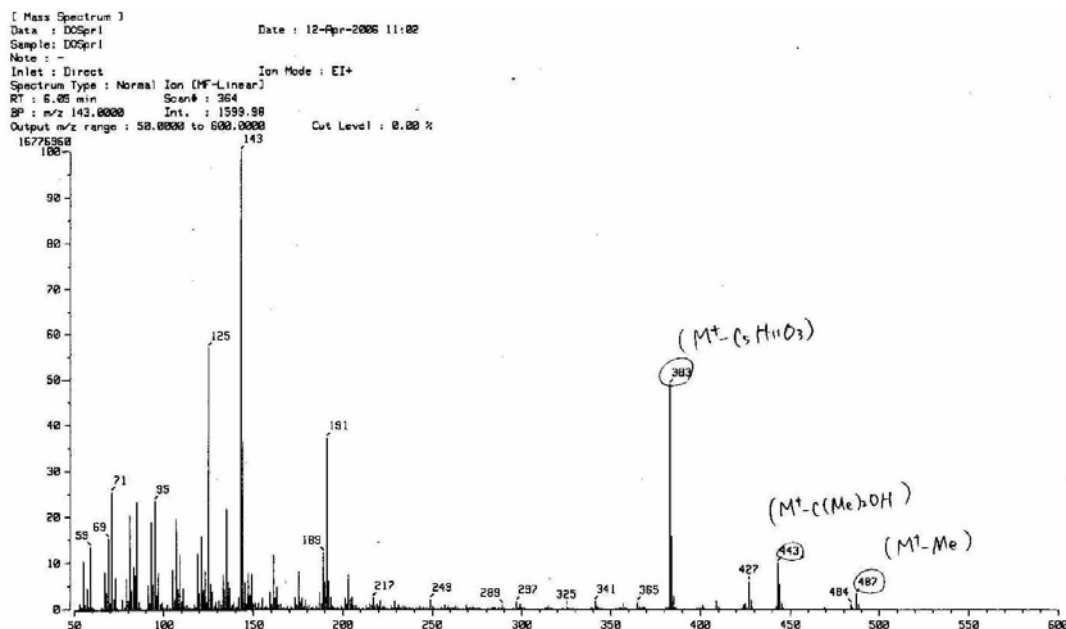

### NMR data of **41** acetate in $\text{CDCl}_3$ .

#### Product 41 acetate (solid) from 21 in $\text{CDCl}_3$

$[\alpha]_D^{25} = +11.38$  in EtOH  
 $c = 0.27$

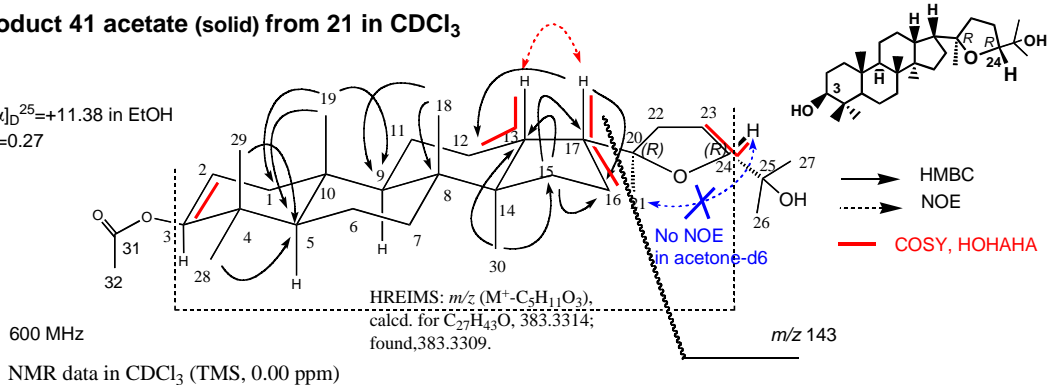

| NO. | $^1\text{H}$            | $^{13}\text{C}$ | NO. | $^1\text{H}$          | $^{13}\text{C}$    | NO. | $^1\text{H}$          | $^{13}\text{C}$    | NO. | $^1\text{H}$             | $^{13}\text{C}$    |
|-----|-------------------------|-----------------|-----|-----------------------|--------------------|-----|-----------------------|--------------------|-----|--------------------------|--------------------|
| 1   | 1.048(m); 1.69(m)       | 38.70           | 9   | 1.37(dd, 12.7, 2.7Hz) | 50.63              | 17  | 2.24(m)               | 48.56              | 25  | —                        | 70.12              |
| 2   | 1.64(2H,m)              | 23.73           | 10  | —                     | 37.08              | 18  | 0.936(3H,s)           | 15.83 <sub>c</sub> | 26  | 1.099(3H,s) <sup>b</sup> | 24.02 <sup>b</sup> |
| 3   | 4.48(dd, 11.1, 5.2Hz)   | 80.95           | 11  | 1.17(m); 1.55(m)      | 22.62              | 19  | 0.857(3H,s)           | 16.30              | 27  | 1.200(3H,s) <sup>b</sup> | 28.48 <sup>b</sup> |
| 4   | —                       | 37.90           | 12  | 1.47(m); 1.93(m)      | 25.86 <sup>d</sup> | 20  | —                     | 85.63              | 28  | 0.847(3H,s)              | 28.04 <sup>a</sup> |
| 5   | 0.84(m)                 | 55.98           | 13  | 2.07(m)               | 43.73              | 21  | 1.200(3H,s)           | 27.95 <sup>a</sup> | 29  | 0.847(3H,s)              | 16.36 <sup>c</sup> |
| 6   | 1.44(m); 1.52(m)        | 18.32           | 14  | —                     | 49.05              | 22  | 1.63(m); 1.90(m)      | 37.90              | 30  | 0.965(3H,s)              | 16.47 <sup>c</sup> |
| 7   | 1.26(bd, 12.4); 1.57(m) | 35.25           | 15  | 1.08(m); 1.42(m)      | 32.41              | 23  | 1.72(m); 1.85(m)      | 25.92 <sup>d</sup> | 31  | —                        | 170.9              |
| 8   | —                       | 40.76           | 16  | 1.49(m); 1.76(m)      | 27.73              | 24  | 3.71(dd, 10.7, 5.2Hz) | 86.95              | 32  | 2.04(3H,s)               | 21.31              |

The signals of a-d are exchangeable.

## NMR data of **41** acetate in Acetone $d_6$ .

### Product **42** acetate (solid) from **21** in acetone $d_6$

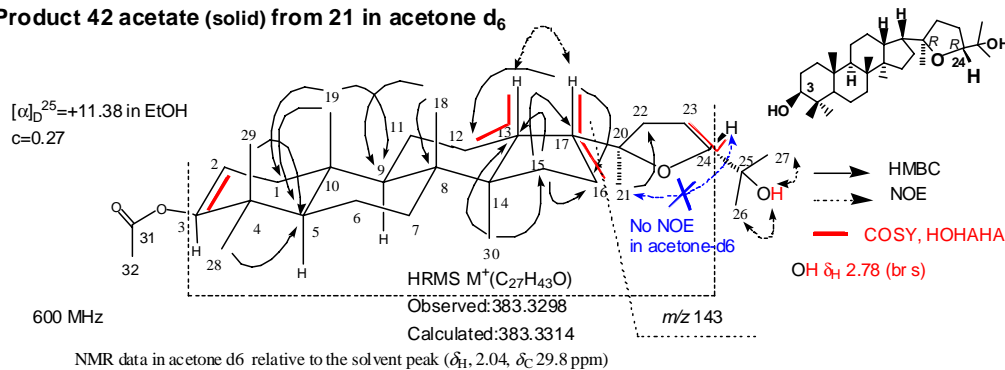

| NO. | $^1H$                   | $^{13}C$ | NO. | $^1H$           | $^{13}C$ | NO. | $^1H$               | $^{13}C$ | NO. | $^1H$                    | $^{13}C$           |
|-----|-------------------------|----------|-----|-----------------|----------|-----|---------------------|----------|-----|--------------------------|--------------------|
| 1   | 1.08(m);1.70(m)         | 39.35    | 9   | 1.47(m)         | 51.39    | 17  | 2.25(m)             | 49.33    | 25  | —                        | 70.39              |
| 2   | 1.61(2H, m)             | 24.44    | 10  | —               | 37.79    | 18  | 0.974(3H,s)         | 16.21    | 26  | 1.049(3H,s) <sup>b</sup> | 25.82 <sup>c</sup> |
| 3   | 4.43(dd, 11.4, 5.0Hz)   | 80.99    | 11  | 1.21(m);1.56(m) | 23.33    | 19  | 0.889(3H,s)         | 16.66    | 27  | 1.134(3H,s) <sup>b</sup> | 27.36 <sup>c</sup> |
| 4   | —                       | 38.53    | 12  | 1.53(m);1.94(m) | 26.75    | 20  | —                   | 86.01    | 28  | 0.843(3H,s)              | 28.25              |
| 5   | 0.915(dd, 11.6, 2.3 Hz) | 55.65    | 13  | 2.08(m)         | 44.63    | 21  | 1.189(3H,s)         | 28.89    | 29  | 0.855(3H,s)              | 16.88 <sup>a</sup> |
| 6   | 1.48(m);1.55(m)         | 19.00    | 14  | —               | 49.77    | 22  | 1.57(m);1.92(m)     | 38.64    | 30  | 1.031(3H,s)              | 16.84 <sup>a</sup> |
| 7   | 1.28(m);1.64(m)         | 35.99    | 15  | 1.07(m);1.43(m) | 33.14    | 23  | 1.74(m);1.83(m)     | 26.36    | 31  | —                        | 170.67             |
| 8   | —                       | 41.46    | 16  | 1.53(m);1.77(m) | 28.27    | 24  | 3.71(dd, 10.6, 5.2) | 88.24    | 32  | 1.980(3H,s)              | 21.05              |

The signals of a~c exchangeable in respect to the same letters.

## Product **42**

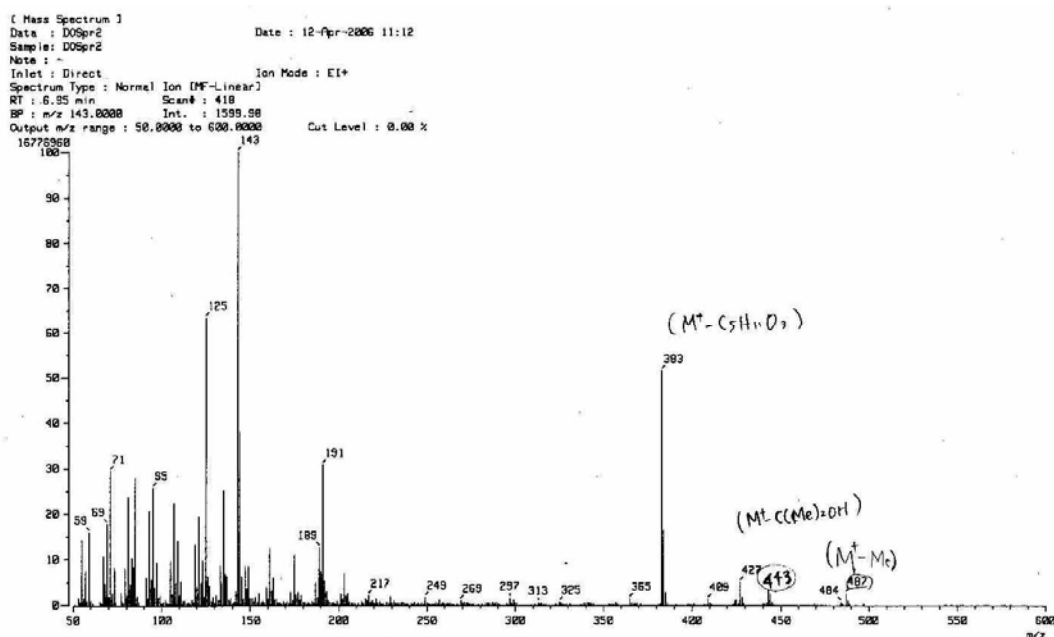

### NMR data of **42** acetate in $CDCl_3$

Product **42** acetate (oil) from **22** in  $CDCl_3$

$[\alpha]_D^{25} = -17.3$  in EtOH  
 $c=0.36$

600 MHz

NMR data in  $CDCl_3$  (TMS, 0.0 ppm)

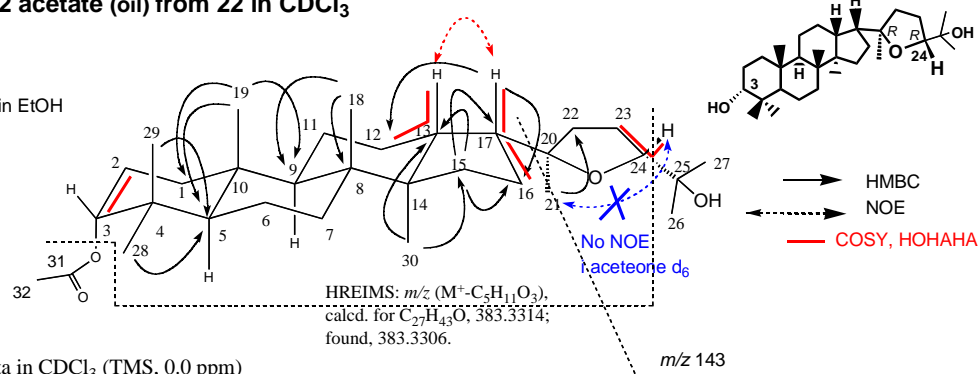

| NO. | $^1H$            | $^{13}C$ | NO. | $^1H$            | $^{13}C$           | NO. | $^1H$                 | $^{13}C$           | NO. | $^1H$                    | $^{13}C$           |
|-----|------------------|----------|-----|------------------|--------------------|-----|-----------------------|--------------------|-----|--------------------------|--------------------|
| 1   | 1.17(m); 1.42(m) | 34.25    | 9   | 1.46(m)          | 50.49              | 17  | 2.24(m)               | 48.55              | 25  | —                        | 70.15              |
| 2   | 1.58(m); 1.78(m) | 22.92    | 10  | —                | 37.18              | 18  | 0.947(3H,s)           | 15.87              | 26  | 1.103(3H,s) <sup>a</sup> | 23.98 <sup>b</sup> |
| 3   | 4.62(bs)         | 78.42    | 11  | 1.17(m); 1.58(m) | 22.44              | 19  | 0.855(3H,s)           | 16.04              | 27  | 1.208(3H,s) <sup>a</sup> | 28.88 <sup>b</sup> |
| 4   | —                | 36.77    | 12  | 1.46(m); 1.95(m) | 25.86 <sup>c</sup> | 20  | —                     | 85.64              | 28  | 0.834(3H,s)              | 28.00              |
| 5   | 1.23(m)          | 50.78    | 13  | 2.07(m)          | 43.75              | 21  | 1.208(3H,s)           | 28.00              | 29  | 0.882(3H,s)              | 21.73              |
| 6   | 1.42(2H,m)       | 18.25    | 14  | —                | 49.16              | 22  | 1.62(m); 1.92(m)      | 38.01              | 30  | 1.023(3H,s)              | 16.53              |
| 7   | 1.26(m); 1.61(m) | 35.15    | 15  | 1.08(m); 1.42(m) | 32.42              | 23  | 1.73(m); 1.83(m)      | 25.98 <sup>c</sup> | 31  | —                        | 170.8              |
| 8   | —                | 40.94    | 16  | 1.50(m); 1.76(m) | 27.65              | 24  | 3.72(dd, 10.8, 5.1Hz) | 87.05              | 32  | 2.089(3H,s)              | 21.40              |

The signals of a-c are exchangeable in respect to the same letters.

### NMR data of **42** acetate in Acetone $d_6$ .

Product **42** acetate (oil) from **22** in acetone  $d_6$

$[\alpha]_D^{25} = -17.3$  in EtOH  
 $c=0.36$

600 MHz

NMR data in acetone  $d_6$  relative to the solvent peak ( $\delta_H$ , 2.04,  $\delta_C$ , 29.8 ppm)

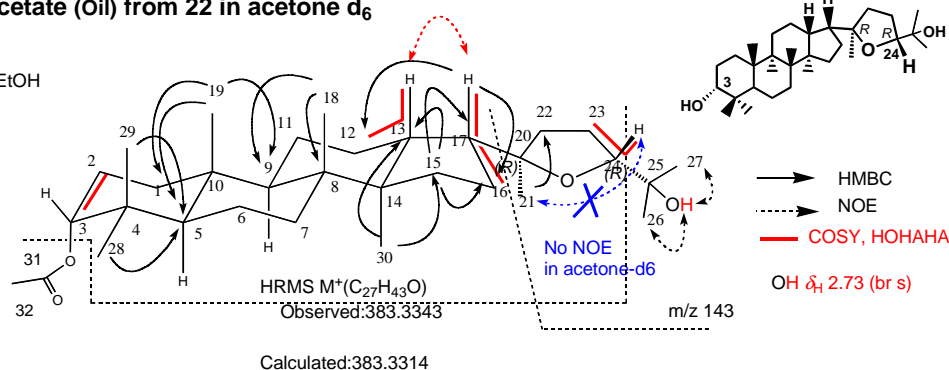

| NO. | $^1H$            | $^{13}C$ | NO. | $^1H$            | $^{13}C$ | NO. | $^1H$                  | $^{13}C$ | NO. | $^1H$                    | $^{13}C$           |
|-----|------------------|----------|-----|------------------|----------|-----|------------------------|----------|-----|--------------------------|--------------------|
| 1   | 1.22(m); 1.43(m) | 34.99    | 9   | 1.51(m)          | 51.40    | 17  | 2.25(m)                | 49.31    | 25  | —                        | 70.43              |
| 2   | 1.51(m); 1.90(m) | 23.54    | 10  | —                | 37.89    | 18  | 0.981(3H,s)            | 16.25    | 26  | 1.056(3H,s) <sup>a</sup> | 25.79 <sup>b</sup> |
| 3   | 4.56 (br s)      | 78.43    | 11  | 1.22(m); 1.58(m) | 23.14    | 19  | 0.895(3H,s)            | 16.41    | 27  | 1.139(3H,s) <sup>a</sup> | 27.34 <sup>b</sup> |
| 4   | —                | 37.41    | 12  | 1.53(m); 1.94(m) | 26.76    | 20  | —                      | 86.03    | 28  | 0.832(3H,s)              | 28.27              |
| 5   | 1.31(2H, m)      | 51.64    | 13  | 2.11(m)          | 44.59    | 21  | 1.193(3H,s)            | 28.90    | 29  | 0.898(3H,s)              | 22.06              |
| 6   | 1.45(m)          | 18.91    | 14  | —                | 49.83    | 22  | 1.57(m); 1.92(m)       | 38.68    | 30  | 1.046(3H,s)              | 17.00              |
| 7   | 1.27(m); 1.63(m) | 35.95    | 15  | 1.07(m); 1.44(m) | 33.11    | 23  | 1.76(m); 1.85(m)       | 26.38    | 31  | —                        | 170.5              |
| 8   | —                | 41.63    | 16  | 1.54(m); 1.76(m) | 28.23    | 24  | 3.72 (dd, 10.6, 5.3Hz) | 88.28    | 32  | 2.00(3H,s)               | 21.10              |

The signals of a-b are exchangeable in respect to the same letters.

## 7. Major Fragment ions of Enzymatic Products in EI-MS of Products 33,34 and 37-42

### Products 33, 37, 40

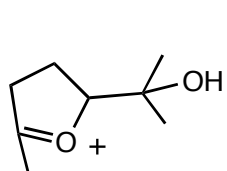

$m/z$  143

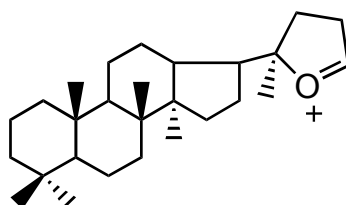

$m/z$  385

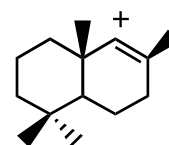

$m/z$  191

### Product 34

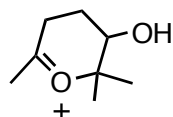

$m/z$  143

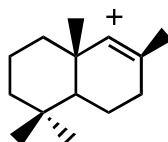

$m/z$  191

### Acetates of Products 39-42

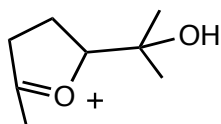

$m/z$  143

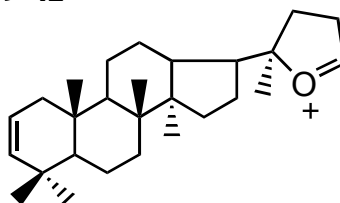

$m/z$  383

**8. GCMS of acetate mixtures obtained by incubating diastereomeric mixture of dioxidosqualene 20-22 (Minor Peaks)**

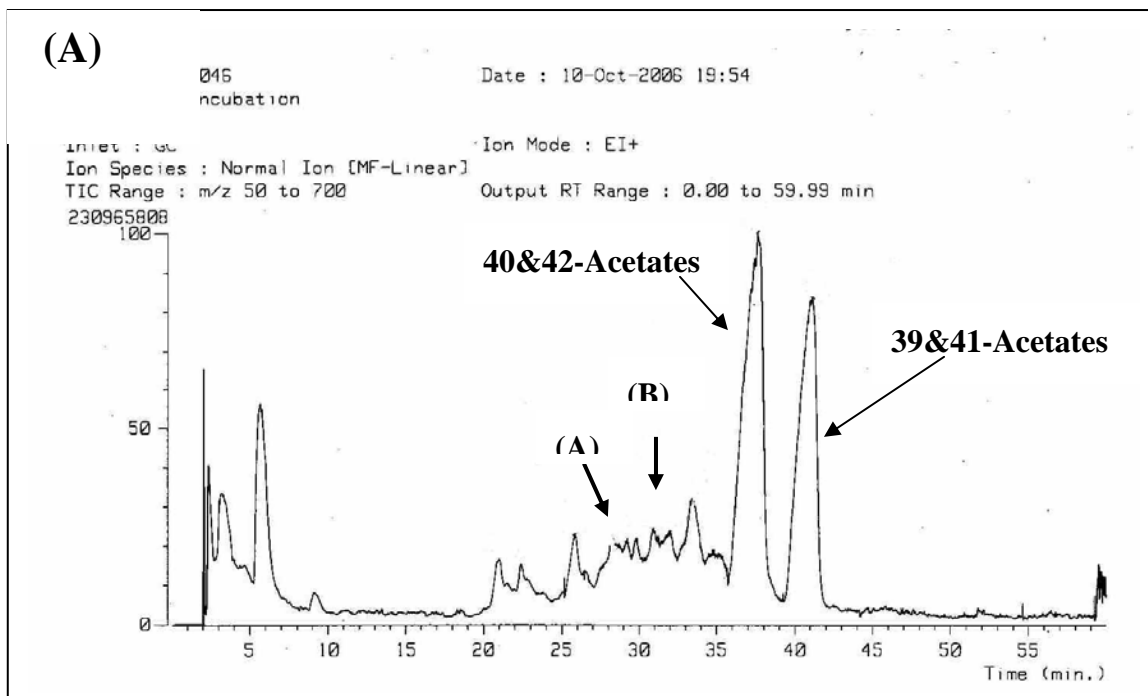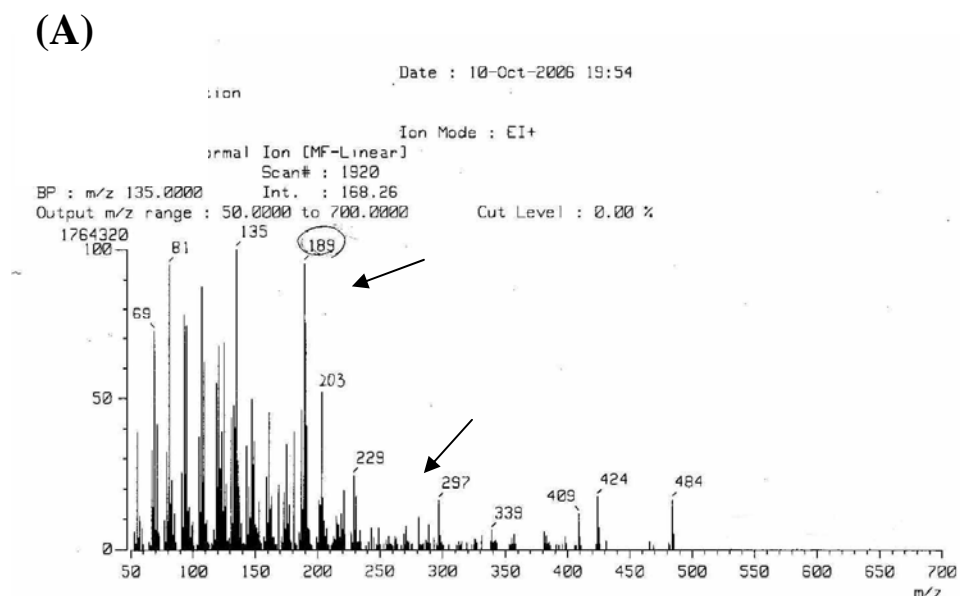

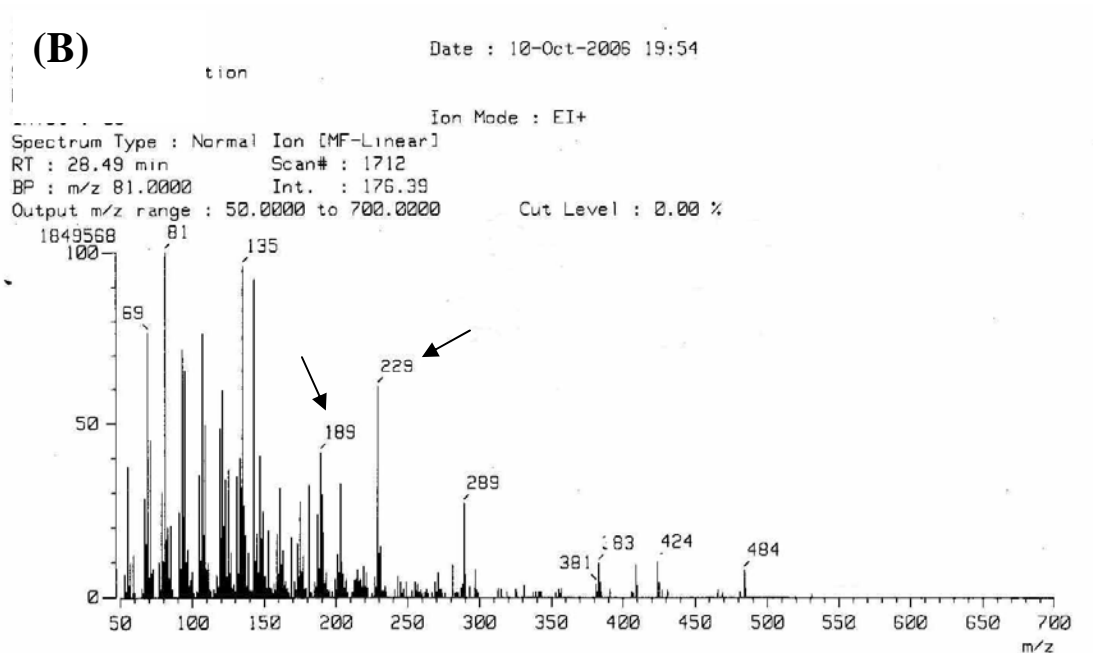

The ions of  $m/z$  189 and  $m/z$  229 suggest the following fragments.  $m/z$  229 is characteristic of a 6/6/5-fused tricyclic skeleton. Probably, these minor product peaks would contain bi- and tricyclic compounds. It should be noted that (B) and (C) do not show the EIMS spectra of pure products, because many peaks are overlapped in the GCMS trace (A).

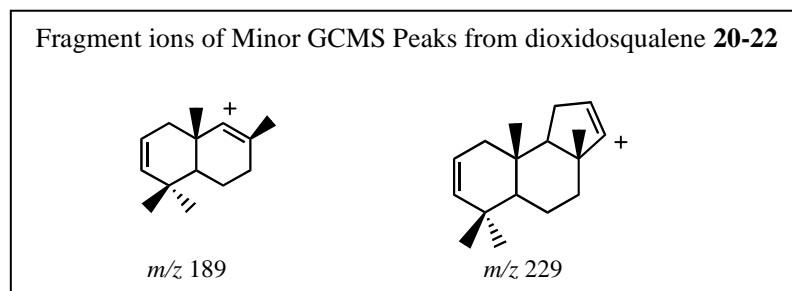

## 7. References

- 1) a) Sato, T. and T. Hoshino, *Biosci. Biotechnol. Biochem.*, 1999, **63**, 1171. b) T. Sato, M. Kouda and T. Hoshino, *Biosci. Biotechnol. Biochem.*, 2004, **68**, 728-738.
- 2) a) J-L. Abad, J. Casa, F. Sanchez-Baeza and A. Messeguer, *J. Org. Chem.*, 1995, **60**, 3648-3656. b) G.A. Crispino and K. B. Sharpless, *Tetrahedron Lett.*, 1992, **33**, 4273-4274.
- 3) R.B. Boar and K. Damps, *J. Chem. Soc., Perkin Trans. 1*, **1997**, 709-712.
- 4) J-Luis Abad and F. Camps, *Tetrahedron*, 2004, **60**, 11519-11525.
